# Supplementary material for: TiArA: A Virtual Appliance for the Analysis of Tiling Array Data
Source: PLoS One. 2010 Apr 1;5(4):e9993. doi: 10.1371/journal.pone.0009993 (PMC2848623; doi:10.1371/journal.pone.0009993)
Supplement: Dataset S1 — ORF expression comparison for TAS- and TiArA-processed data. Each sample was processed with both TiArA and TAS. The resulting median and mean intensities per ORF are listed here. Additionally, a P value for expression above background is reported for each ORF. (0.18 MB XLS) [file pone.0009993.s002.xls]

## Sheet: orf_expression
Each sample was processed with both TiArA and TAS. The resulting median and mean intensities per ORF are listed here. Additionally, a P value for expression above background is reported for each ORF.
							Tiara - 1hr					Tiara - 2hr					Tiara - 4hr					Tiara - 8hr					TAS - 1hr					TAS - 2hr					TAS - 4hr					TAS - 8hr
ORF	start	end	strand	Genbank Accession	N		median	mean	sd	P		median	mean	sd	P		median	mean	sd	P		median	mean	sd	P		median	mean	sd	P		median	mean	sd	P		median	mean	sd	P		median	mean	sd	P
VACWR001	3641	4375	-	AY243312	184		2.003	2.13817	1.48077	2.3465e-41		6.6308	6.26152	1.58807	4.07832e-56		6.6312	6.32636	1.61133	4.07832e-56		6.04945	5.77054	1.79962	6.9417e-52		6.93074	6.61236	2.33993	6.97837e-47		11.5316	11.0793	1.53248	4.07832e-56		11.7947	11.3576	1.60622	4.07832e-56		11.1091	10.6142	2.02763	6.9417e-52
VACWR002	4789	4974	-	AY243312	47		0.1527	0.245998	0.413866	0.12148		1.8272	2.02935	1.39891	1.3906e-09		2.2218	2.25581	1.59181	1.2452e-05		1.983	2.17882	1.67468	0.000173001		1.88753	2.08674	1.84292	0.00931192		6.26679	6.10774	2.12444	7.10543e-15		6.89724	6.36365	2.7671	2.76981e-06		6.55459	6.1534	2.76934	0.000173001
VACWR003	4919	5137	+	AY243312	55		0.0332	0.221167	0.683041	0.790623		0.0489	0.292922	0.863997	0.992773		0.6018	1.04021	1.07859	0.704973		1.2783	1.59405	1.40848	0.0290321		0	1.29949	1.93777	0.984986		0	1.54363	2.14669	0.998666		3.90689	3.86465	2.71046	0.704973		5.90689	5.08166	2.84383	0.0150145
VACWR004	5092	5460	-	AY243312	92		0.2336	0.433927	0.588549	4.63202e-05		2.77495	2.66837	1.58315	1.96165e-16		3.45725	3.10722	1.81547	7.99858e-11		3.55005	3.23485	1.83788	3.08109e-12		2.52219	2.53742	2.32574	0.0140085		7.36247	6.68618	2.77645	2.07212e-17		8.51037	7.38876	3.10077	7.99858e-11		8.42184	7.4959	2.90287	3.08109e-12
VACWR005	5578	5724	-	AY243312	37		0.0973	0.111149	0.279058	0.162004		1.8272	1.9874	0.932655	7.27596e-12		2.2561	2.31874	1.08712	6.16565e-08		2.2106	2.29542	1.11332	5.12227e-09		2.74416	2.02657	1.81489	0.162004		6.39232	6.19479	1.62921	2.76486e-10		7.15684	6.89698	1.51518	6.16565e-08		6.84549	6.64373	1.78914	5.12227e-09
VACWR006	5961	6155	-	AY243312	49		0.3155	0.349945	0.425906	0.0427166		3.2409	2.61883	1.4547	3.49054e-11		3.5204	2.95291	1.65096	2.86388e-08		3.224	2.93804	1.72725	2.86388e-08		3.45943	2.79155	1.97162	0.000701344		7.97728	6.83537	2.27053	2.17781e-12		8.46352	7.38388	2.56516	4.11273e-10		7.98868	7.19737	2.76437	3.79858e-09
VACWR007	6088	6417	-	AY243312	82		0.27195	0.436759	0.6655	0.00991346		2.36205	2.41891	1.63948	7.8435e-17		2.66035	2.8466	1.86032	5.67467e-10		2.537	2.82452	1.9174	1.12599e-08		2.18926	2.57854	2.30873	0.000610191		6.87108	6.45357	2.57734	6.02319e-18		7.58247	7.16243	2.8371	1.12792e-10		7.27881	6.98207	2.92142	2.62866e-09
VACWR008	6722	7060	-	AY243312	85		0.1825	0.459453	0.711166	0.00109745		2.3692	2.47324	1.8333	2.31429e-11		2.8957	2.89949	2.04385	1.08753e-08		2.6781	2.80391	2.09896	1.63824e-06		2.80735	2.68091	2.29301	0.00050811		6.97728	6.29587	3.07042	9.29138e-14		7.87036	7.09767	3.15349	4.20616e-08		7.36632	6.71723	3.33372	1.63824e-06
VACWR009	7333	7755	+	AY243312	105		2.3559	2.41698	1.61767	7.47669e-21		6.016	5.46648	2.25856	1.226e-25		5.6585	5.06188	2.25603	6.93464e-18		4.7133	4.20527	2.19966	1.63825e-14		7.29462	6.78413	2.83299	6.03272e-22		10.8475	9.97554	3.00585	4.75846e-27		10.6961	9.68702	3.21822	6.93464e-18		9.5812	8.51935	3.3818	2.66101e-15
VACWR010	7910	8905	-	AY243312	249		0.1444	0.304543	0.522135	3.9319e-05		1.8548	2.08705	1.81512	2.39445e-21		1.9359	2.20123	1.91439	1.5824e-07		1.7462	2.12621	1.86204	2.17379e-06		2.32193	2.20544	2.03118	2.27785e-05		6.24793	5.55556	3.25685	5.14867e-25		6.59991	5.82205	3.46491	7.87197e-08		6.14975	5.59797	3.35699	7.27561e-06
VACWR011	9417	9962	+	AY243312	136		0.1589	0.38984	0.621482	0.000381705		2.36545	2.49191	1.8966	1.64686e-19		2.02565	2.37392	1.93749	1.36493e-07		1.35475	1.91018	1.76771	0.000199283		2.32193	2.3581	2.11205	4.952e-05		6.861	6.25545	3.15633	3.45288e-21		6.70297	6.21752	3.29108	1.86011e-08		5.48864	5.27264	3.21701	0.000381705
VACWR012	9937	10125	+	AY243312	47		0.1409	0.42413	0.833669	0.5		1.9005	2.30295	1.9958	1.22899e-08		1.9143	2.16426	2.04179	0.00931192		1.1561	1.70791	1.86366	0.12148		1.20163	1.93965	2.35753	0.385433		6.35755	5.9466	3.34017	5.35456e-07		6.75087	5.78885	3.55966	0.019993		5.1416	5.04315	3.2832	0.12148
VACWR013	10291	10671	-	AY243312	95		0.703	1.21748	1.31854	1.0415e-13		4.6096	4.26167	2.4047	2.3486e-20		4.7985	4.28054	2.51875	8.20774e-11		4.2668	3.93341	2.48302	1.49954e-09		4.70044	4.67821	2.78468	1.0415e-13		9.54786	8.57953	3.27381	8.39732e-23		9.83131	8.64718	3.67975	1.73377e-11		9.18982	8.09164	3.66377	5.81983e-09
VACWR014	10730	11443	-	AY243312	179		0.0365	0.101089	0.297732	0.974164		1.0489	1.27179	1.2083	7.29912e-15		1.4197	1.68517	1.53793	2.39268e-05		1.3599	1.76593	1.62006	0.000154254		0	1.3884	1.67422	0.910831		4.89239	4.40631	2.67915	1.99474e-15		5.72792	5.24513	2.96399	1.22681e-05		5.50779	5.17827	3.04881	8.48226e-05
VACWR015	11532	11945	-	AY243312	103		0.1528	0.375561	0.625676	0.000744836		1.6419	1.96895	1.73305	7.31124e-09		2.4357	2.61568	2.14958	3.29817e-05		2.6845	2.80016	2.34034	0.000170499		2.16992	2.2398	2.07824	0.000744836		5.96578	5.2972	3.28294	5.34838e-10		7.23554	6.35142	3.65127	1.35882e-05		7.42794	6.4701	3.74968	0.000170499
VACWR016	12212	12445	-	AY243312	58		0.0908	0.22176	0.430621	0.347002		1.9556	1.96331	1.60516	5.02483e-05		2.65355	2.63311	2.02905	0.000430891		2.6709	2.63028	2.17293	0.00267743		1.58496	1.9406	2.01167	0.179072		6.28777	5.45907	3.1557	1.0158e-06		7.40462	6.39289	3.69908	0.000430891		7.30028	6.37262	3.57692	0.00267743
VACWR017	12467	12682	-	AY243312	54		0.3834	0.624954	0.820191	0.000267718		3.1757	2.91752	1.86421	6.92168e-08		4.5205	3.92757	2.23173	3.64422e-07		4.85455	4.14778	2.41599	1.69284e-06		3.23135	3.15688	2.34598	2.60472e-05		7.88388	6.84799	3.10647	1.62827e-09		9.54302	8.24761	3.38799	3.64422e-07		9.76422	8.28872	3.67207	1.69284e-06
VACWR018	12809	12991	-	AY243312	46		3.6548	3.22062	1.82046	1.53761e-11		7.59115	6.92661	1.87962	6.6791e-13		7.5416	6.79187	2.06843	1.53761e-11		7.19275	6.38965	2.13947	1.53761e-11		7.7618	6.90045	3.24096	2.5501e-09		12.3006	11.4929	2.36287	6.6791e-13		12.3933	11.6234	2.40608	1.53761e-11		11.8888	11.0483	2.76725	1.53761e-11
VACWR019	13164	15068	-	AY243312	476		0.069	0.146768	0.346706	0.307089		0.7859	1.34929	1.51882	1.89693e-13		0.9576	1.76938	1.89387	0.0368678		1.0238	1.86147	2.01317	0.0542838		0.76554	1.40956	1.68364	0.625817		4.32193	4.15818	3.19419	1.10797e-16		4.91407	4.92787	3.59886	0.0195207		4.8643	4.88839	3.7142	0.0651534
VACWR020	15111	15644	-	AY243312	133		0.0184	0.0471263	0.23074	0.997337		0.4567	0.798685	0.943384	5.92897e-05		2.0504	2.1526	1.88543	0.000456599		2.2121	2.34834	2.07186	0.00266287		0	1.02913	1.40342	0.988099		3.3505	3.33412	2.54052	5.92897e-05		6.70044	5.59996	3.64705	0.000456599		6.76818	5.82061	3.66715	0.000238611
VACWR021	15716	16168	-	AY243312	113		0.2692	0.661882	0.874311	1.17031e-08		3.15	3.03608	2.09957	3.06436e-17		3.0078	3.07914	2.23593	7.44245e-11		2.7111	2.83886	2.19596	3.15336e-07		3.39232	3.31363	2.5158	3.15336e-07		7.7866	6.96507	3.31848	3.06436e-17		7.78136	7.15945	3.47618	7.44245e-11		7.35931	6.72302	3.42315	1.10039e-07
VACWR022	16401	16856	-	AY243312	114		0.5566	1.04895	1.21515	1.14159e-11		3.1999	3.31929	2.08086	3.6176e-21		3.20135	3.32068	2.2478	2.6562e-12		2.88	3.15425	2.28103	2.29479e-09		4.28493	4.12443	2.89119	1.79311e-10		7.87641	7.48662	3.06085	2.86148e-23		8.06068	7.62075	3.27005	2.36072e-14		7.56614	7.27317	3.2993	1.79311e-10
VACWR023	16983	17597	-	AY243312	153		0.1595	0.404611	0.650538	0.00472692		2.5343	2.56722	2.07559	1.80969e-17		2.3427	2.69271	2.30268	5.15314e-06		2.0704	2.60322	2.33693	4.58823e-05		2.32193	2.41913	2.31132	0.00101245		7.10014	6.16079	3.51017	3.9225e-16		7.03122	6.47746	3.71674	2.34825e-06		6.67243	6.16372	3.79353	4.58823e-05
VACWR024	17660	18610	-	AY243312	238		0.2568	0.560891	0.885226	1.18343e-07		2.9853	2.87427	2.27721	5.85461e-24		3.28005	3.189	2.50928	1.46849e-11		2.87845	3.09828	2.55089	5.76458e-12		2.32193	2.68039	2.5933	3.34514e-06		7.71946	6.53905	3.67283	2.47526e-27		8.21916	7.05974	3.96077	2.21732e-12		7.56601	6.79001	3.98601	8.97228e-11
VACWR025	18677	19468	-	AY243312	198		0.1392	0.398108	0.818414	0.000233543		1.1939	1.47783	1.22135	3.12186e-32		4.47105	4.37464	1.79857	2.79975e-45		5.2607	4.91543	1.95215	2.79975e-45		1.63152	2.09118	2.3435	0.0376781		5.11269	4.99304	2.30059	4.20383e-36		9.45386	9.1086	2.48931	5.32228e-44		10.1176	9.60469	2.45945	2.79975e-45
VACWR026	19535	21073	-	AY243312	384		0.09545	0.221985	0.526313	0.00615055		1.42115	1.70002	1.54358	6.99668e-30		1.7756	2.15424	1.85199	3.05501e-11		1.4206	1.86635	1.71789	1.06212e-05		1	1.60084	1.80641	0.36049		5.50884	4.87181	3.04821	8.6873e-29		6.23812	5.68691	3.36244	1.21657e-10		5.56977	5.19726	3.1916	2.53955e-06
VACWR027	21143	21832	-	AY243312	172		0.1569	0.457414	0.71197	0.000280727		1.8355	2.15767	2.0636	4.24499e-10		1.4043	2.15387	2.11594	0.00232091		0.8745	1.7494	1.91429	0.200842		1.90368	2.43591	2.491	0.0089172		6.14766	5.47511	3.61641	1.81393e-12		5.76813	5.43676	3.9083	0.00141681		4.64386	4.72945	3.64761	0.246336
VACWR028	21819	22172	-	AY243312	88		0.29995	0.677081	0.86279	4.60154e-07		2.43795	2.73658	1.99968	2.07622e-15		3.47855	3.27113	2.37807	1.38513e-07		2.92825	2.90715	2.20697	4.25055e-06		2.80735	3.18418	2.64616	7.85743e-05		7.05524	6.62729	3.15148	1.20078e-13		8.52611	7.28862	3.79127	1.38513e-07		7.74181	6.75298	3.59652	1.4397e-06
VACWR029	22309	22836	-	AY243312	132		0.86045	1.32409	1.36287	1.39882e-13		4.26115	3.85081	2.41531	4.52556e-21		3.88575	3.62856	2.50386	2.32843e-12		3.00805	2.96853	2.34548	2.31927e-07		4.83267	4.62603	3.07709	5.84175e-13		9.04339	7.88076	3.66378	4.52556e-21		8.90115	7.75725	3.80642	2.32843e-12		7.67419	6.68214	3.83667	5.93073e-07
VACWR030	22878	24296	-	AY243312	355		0.2219	0.559226	0.874423	1.02328e-09		2.8304	2.89146	2.28333	1.15547e-36		2.9825	2.97629	2.4525	4.50846e-15		2.0818	2.5305	2.29024	1.98801e-09		2.65535	2.8135	2.6004	1.02328e-09		7.54303	6.59815	3.7038	1.06681e-38		7.85674	6.79064	3.97164	1.86842e-15		6.5345	6.10023	3.76915	1.02328e-09
VACWR031	24274	24936	-	AY243312	166		0.84505	1.40484	1.45511	3.95975e-21		4.38865	4.05954	2.40259	9.26106e-31		4.9729	4.28134	2.59993	1.13624e-19		4.10745	3.8592	2.56185	9.85088e-16		4.80735	4.83598	3.05048	5.70011e-19		9.33582	8.24943	3.45113	8.40924e-32		10.0374	8.66062	3.67336	2.16899e-20		9.16113	8.0823	3.52199	3.90076e-15
VACWR032	25071	25925	-	AY243312	213		1.8816	2.37344	2.06292	1.5354e-31		5.239	4.94898	2.42645	1.66441e-49		5.2408	4.83107	2.57583	4.73497e-36		4.3692	4.26012	2.59653	1.69197e-27		6.6865	6.34915	3.46224	2.77063e-33		10.0974	9.38778	3.05399	7.26886e-51		10.2755	9.39748	3.32507	5.1195e-37		9.19229	8.59271	3.42623	2.84468e-28
VACWR033	26147	27256	-	AY243312	277		0.0848	0.179947	0.420373	0.0590421		0.9718	1.28896	1.28765	1.16799e-19		2.8638	2.97009	2.11688	7.24865e-26		1.8913	2.34677	1.96175	1.81929e-12		1.43296	1.6928	1.7683	0.00404238		4.78136	4.40465	2.73716	1.76517e-23		7.6865	7.11086	3.30594	1.73501e-26		6.36982	6.06038	3.27326	5.62724e-11
VACWR034	27306	27572	-	AY243312	67		0.9175	1.36101	1.24024	6.64018e-12		4.0451	3.69424	2.12603	7.47219e-13		4.1976	4.00452	2.39303	1.0729e-08		3.1905	3.25081	2.18587	8.86434e-07		5.23649	4.81782	2.78596	2.02105e-09		8.85487	7.58617	3.50638	3.40575e-10		9.07948	8.05091	3.84657	5.1366e-08		7.853	7.15209	3.45843	3.22954e-06
VACWR035	27624	28898	-	AY243312	319		0.2311	0.617958	1.00423	5.12436e-10		1.2692	1.82253	1.82161	1.95556e-24		2.2768	2.55029	2.16858	5.12631e-15		2.0738	2.4672	2.13646	5.12436e-10		2.40599	2.66501	2.67149	9.57404e-06		5.20945	4.93946	3.32627	8.24479e-22		6.87652	6.30981	3.53702	3.16379e-14		6.49985	5.99947	3.57499	1.59968e-08
VACWR036	28926	29060	-	AY243312	34		1.2256	1.31435	1.19398	9.75628e-05		3.9509	3.41518	1.96301	3.08244e-06		3.58365	3.25154	2.08281	9.75628e-05		2.8493	2.70497	1.92117	0.00146753		5.58157	4.60691	3.10226	0.00146753		8.73588	7.56966	3.05257	3.46918e-08		8.52875	7.42797	3.41721	9.75628e-05		7.51787	6.5717	3.34911	0.000410698
VACWR037	29075	29479	-	AY243312	101		1.6181	1.8724	1.47651	9.10726e-19		4.2012	4.07779	2.0724	2.03211e-27		4.638	4.21633	2.24187	7.11796e-17		4.0244	3.82099	2.35233	2.39936e-14		6.10224	5.78913	3.0551	8.48874e-18		9.20457	8.60479	2.65932	2.03211e-27		9.66889	8.84287	3.0614	7.11796e-17		8.99435	8.17158	3.26616	7.72119e-13
VACWR038	29448	29693	-	AY243312	61		2.143	2.28207	1.75562	2.69031e-11		4.8055	4.35943	2.24589	8.20524e-16		5.3807	4.61941	2.41113	2.69031e-11		4.9337	4.29077	2.41709	1.49322e-09		7.04221	6.25659	3.26267	2.42747e-13		9.57516	8.75721	2.90769	8.20524e-16		10.4094	9.2195	3.17489	2.69031e-11		9.77479	8.655	3.30129	1.49322e-09
VACWR039	29832	30281	+	AY243312	113		0.5406	0.896842	1.02117	4.34667e-12		2.9037	2.77551	2.03582	7.36376e-15		2.3509	2.45871	1.94718	5.7308e-06		1.7812	2.04747	1.77281	0.000154801		4.08746	3.83982	2.6618	7.44245e-11		7.67243	6.47733	3.3972	7.36376e-15		7.09276	6.10215	3.61351	5.7308e-06		6.24413	5.52744	3.25867	3.22269e-05
VACWR040	30346	31026	-	AY243312	171		0.4806	1.03198	1.29002	7.40263e-14		4.5067	3.9747	2.61656	4.60667e-30		4.3953	3.9565	2.78481	2.77222e-12		3.8156	3.62709	2.71762	2.24387e-10		3.90689	3.99113	2.96649	2.0725e-14		9.19229	8.00948	3.72034	4.68849e-31		9.41574	8.06802	4.05812	2.55798e-13		8.61912	7.51081	4.03231	2.24387e-10
VACWR041	31038	31481	-	AY243312	111		0.7821	1.31075	1.43541	9.42682e-17		5.4001	4.78963	2.38281	2.39472e-27		5.7388	5.0318	2.57425	2.04269e-19		5.4362	4.75676	2.62046	1.72331e-18		5.04439	4.61659	2.9747	1.13008e-13		10.2264	9.20525	3.09712	5.1762e-26		10.7928	9.63371	3.32641	2.04269e-19		10.4391	9.13782	3.49327	1.72331e-18
VACWR042	31505	32947	-	AY243312	361		0.1595	0.388737	0.58182	3.25976e-08		1.9403	2.14051	1.77874	1.20036e-38		2.2334	2.52059	2.03585	1.99862e-18		2.3587	2.6722	2.19297	3.25097e-15		2.32193	2.37298	2.20256	1.05586e-07		6.36282	5.69479	3.20831	5.72579e-38		7.03012	6.35376	3.47115	3.57365e-20		6.94251	6.42541	3.57689	3.53732e-17
VACWR043	32958	33917	-	AY243312	240		0.50655	1.06983	1.29542	6.11362e-15		4.62885	3.94994	2.73258	4.45886e-27		4.58525	4.05061	2.89553	6.76608e-17		4.22375	3.77017	2.85156	2.15666e-16		3.98635	3.95948	3.11771	1.42684e-13		9.44359	7.83142	4.1404	8.80891e-28		9.70955	8.07991	4.35005	6.72224e-16		9.05584	7.61448	4.29545	2.07521e-17
VACWR044	33949	34917	-	AY243312	242		0.209	0.467995	0.715944	5.88533e-07		1.5369	1.84925	1.72166	7.52459e-19		2.39925	2.73675	2.26314	2.18599e-11		2.68795	2.89896	2.43093	7.06853e-10		1.94376	2.42302	2.4512	0.0027982		5.63517	5.09875	3.27712	2.59639e-18		7.17725	6.54525	3.7343	3.41861e-12		7.34338	6.62235	3.82724	7.06853e-10
VACWR045	34947	35171	-	AY243312	56		0.18435	0.432407	0.608121	0.252202		2.1175	2.41858	2.30775	0.00228077		2.7415	3.00932	2.86666	0.114403		2.62245	3.01948	2.97516	0.174841		2.424	2.524	2.4283	0.114403		6.54688	5.52345	4.11175	0.00228077		7.48217	6.31779	4.72677	0.114403		7.34769	6.24156	4.70843	0.174841
VACWR046	35187	35429	-	AY243312	60		1.52205	1.55011	1.2243	4.86148e-11		5.45685	4.62465	2.28439	4.54225e-13		5.7125	4.77151	2.50325	3.83596e-10		5.3123	4.49512	2.46249	1.54252e-08		5.96587	5.15906	2.82291	1.54252e-08		10.0815	8.92204	3.18126	3.12693e-14		10.6451	9.19607	3.54755	3.83596e-10		10.1403	8.79708	3.41788	1.54252e-08
VACWR047	35577	35774	-	AY243312	50		0.56835	0.908708	0.949229	0.000152932		3.67295	3.45895	1.87498	4.52971e-14		4.5942	4.19729	2.23359	1.62187e-08		4.6053	4.24592	2.37087	2.10493e-09		3.76021	3.39799	2.90847	0.0324543		8.44837	7.75789	2.5882	1.13332e-12		9.54886	8.77589	2.94169	2.10493e-09		9.52548	8.6489	3.12023	2.10493e-09
VACWR048	35834	36472	-	AY243312	160		0.02185	0.0637269	0.271697	0.882209		0.5019	0.755067	0.923261	0.00165787		1.43985	1.86735	1.70097	2.39977e-05		1.83575	2.26591	2.00046	1.18064e-05		0	1.06554	1.49435	0.999439		3.43948	3.17493	2.55384	0.00165787		6.08683	5.34186	3.33427	0.000171929		6.40065	5.73756	3.61043	4.74935e-05
VACWR049	36459	37778	-	AY243312	330		0.07305	0.286892	0.668728	0.174691		0.57305	1.51738	1.9675	7.3081e-07		1.096	2.00144	2.21883	0.0158234		0.85965	2.00386	2.27225	0.174691		0.67525	1.69833	2.07474	0.60841		3.58496	4.09337	3.67523	7.3081e-07		5.15987	5.11573	3.9534	0.0269269		4.59983	4.92194	4.02205	0.272446
VACWR050	37801	38847	-	AY243312	262		1.5362	1.82758	1.59977	8.9161e-47		5.793	5.14405	2.36471	6.88579e-65		5.77225	5.00747	2.55315	8.53912e-45		5.3511	4.62162	2.59819	2.76572e-39		6.25546	5.65265	3.08112	5.80088e-42		10.6334	9.64061	3.00817	1.95147e-63		10.7508	9.64658	3.28535	8.92389e-46		10.2016	9.07517	3.3625	4.70606e-41
VACWR051	38890	40797	-	AY243312	477		0.4951	0.951588	1.17194	3.87201e-33		3.3739	3.18308	2.27398	2.10182e-55		3.6798	3.49998	2.51887	2.95938e-35		3.2429	3.36545	2.5581	3.80704e-29		3.90689	3.83365	2.89661	4.12884e-32		8.1205	7.04726	3.6156	3.03063e-62		8.60103	7.52976	3.94572	2.40891e-36		8.04985	7.2059	3.95987	3.80704e-29
VACWR052	40831	41949	-	AY243312	279		0.1069	0.215124	0.462458	0.036148		1.2713	1.66558	1.60191	7.01768e-24		4.2182	3.86171	2.47837	3.46563e-28		4.3393	3.96577	2.5913	6.5985e-27		1	1.60447	1.86992	0.405395		5.29646	4.95291	3.03252	2.78113e-26		9.25314	8.08985	3.77193	3.48904e-30		9.27146	8.02716	3.89027	2.78113e-26
VACWR053	41967	42188	-	AY243312	55		1.1234	1.42324	1.29597	6.54379e-09		5.1971	4.43844	2.22301	4.27713e-14		4.8915	4.42604	2.42962	1.06792e-10		4.3576	3.94209	2.47982	1.02863e-06		5.24031	4.92312	2.893	6.54379e-09		10.0056	8.7786	3.06705	7.70939e-13		9.89178	8.99978	3.17203	1.06792e-10		9.22641	8.1399	3.54518	2.16819e-07
VACWR054	42460	42903	-	AY243312	111		0.0759	0.263933	0.543087	0.223903		0.9038	1.79089	1.96237	1.16313e-05		0.8252	1.67621	1.93942	0.17129		0.5787	1.41476	1.75248	0.776097		1.67807	1.91125	2.12075	0.223903		4.75489	4.77309	3.66653	4.72552e-06		4.73877	4.74461	3.69929	0.0642377		3.90689	4.13263	3.47257	0.82871
VACWR055	42944	43639	-	AY243312	174		0.1392	0.405275	0.757525	0.00606908		2.54835	2.66065	2.08198	2.29209e-19		2.60175	2.75504	2.2278	1.45052e-09		1.91495	2.37787	2.14427	3.16153e-06		2.32193	2.38119	2.31761	0.0009001		7.17912	6.40676	3.42635	3.14688e-22		7.39527	6.66807	3.57416	6.84272e-11		6.40257	5.92476	3.59398	1.31408e-05
VACWR056	43702	44007	+	AY243312	76		0.0903	0.114901	0.362425	0.365504		0.1299	0.181275	0.436894	0.985687		5.3907	4.61661	2.22903	2.16718e-12		6.0299	5.21477	2.40563	2.81645e-13		0.38277	1.35318	1.63274	0.634496		0.79248	1.40381	1.59728	0.985687		10.3982	9.17648	3.33178	1.48002e-11		10.946	9.66014	3.52074	2.16718e-12
VACWR057	44004	45443	-	AY243312	360		0.074	0.216463	0.500139	0.246648		0.8327	1.55701	1.76106	6.03876e-11		0.87105	1.62999	1.88473	0.134179		0.3965	1.25991	1.62329	0.9998		1.10082	1.68119	1.93529	0.15832		4.53908	4.36167	3.49783	1.40937e-11		4.77595	4.56194	3.71258	0.112692		3.36457	3.83129	3.36699	0.999563
VACWR058	45440	47653	-	AY243312	553		0.1134	0.339608	0.645656	6.82956e-06		1	1.55524	1.67296	4.46777e-32		1.0643	1.80105	1.90812	0.000327916		0.9284	1.67121	1.83709	0.134435		2	2.14557	2.18783	3.07918e-06		4.85798	4.59956	3.18454	5.10854e-33		5.12928	5.03704	3.52377	0.000327916		4.70044	4.70408	3.43902	0.0530129
VACWR059	47780	48352	-	AY243312	143		3.2192	3.12855	1.9772	5.11816e-30		7.0671	6.41997	2.01988	9.23467e-40		7.1063	6.29983	2.18908	1.54158e-36		6.4123	5.70125	2.27431	1.97451e-32		8.30378	7.69368	3.05035	1.97451e-32		11.8986	11.1137	2.30785	1.29144e-41		12.1343	11.181	2.5674	1.54158e-36		11.3382	10.4196	2.74474	1.00091e-33
VACWR060	48408	49187	-	AY243312	195		1.3397	1.56948	1.4266	1.78492e-31		4.7206	4.28633	2.14238	1.45264e-48		4.8556	4.21488	2.32556	2.39983e-33		4.1649	3.72041	2.2481	7.83237e-25		5.91886	5.19011	2.9684	1.422e-30		9.51373	8.74656	2.72244	1.18776e-51		9.84549	8.7717	3.07896	2.12669e-32		9.01764	8.06325	3.02076	4.37077e-24
VACWR061	49236	50261	+	AY243312	257		1.2016	1.61185	1.5124	9.74163e-35		5.1751	4.60067	2.44293	1.65238e-43		4.7051	4.28617	2.52543	1.19619e-31		3.6592	3.63427	2.46899	1.96835e-25		5.62936	5.27522	2.96894	6.3911e-39		10.0485	8.80176	3.51017	1.62527e-47		9.76951	8.56719	3.77417	3.63283e-33		8.43796	7.66238	3.70694	9.87536e-27
VACWR062	50398	52101	+	AY243312	426		0.0721	0.16395	0.4196	0.26442		0.2766	0.796876	1.19648	0.0050749		1	1.68773	1.77769	0.0113327		0.7301	1.52544	1.66687	0.668575		1	1.4941	1.68136	0.36727		2.52351	2.95518	2.73584	4.81908e-06		5.12869	4.77117	3.5502	0.0113327		4.24793	4.50073	3.27367	0.557772
VACWR063	52183	52683	+	AY243312	125		0	0.0706672	0.31587	0.99402		0.1101	0.213131	0.442789	0.998887		1.6332	1.98666	1.91834	0.0366072		0.7462	1.45963	1.55561	0.57094		0	1.14983	1.53382	0.990161		1	1.49683	1.6954	0.99402		6.20945	5.33989	3.6107	0.0243311		4.47897	4.45725	3.19997	0.42906
VACWR064	52808	53629	+	AY243312	206		0.0332	0.0971762	0.359605	0.984733		0.1333	0.243533	0.514865	0.989367		1.06395	1.78723	1.79149	0.000504919		0.68925	1.35179	1.50231	0.68707		0	1.15731	1.52133	0.978467		1	1.5947	1.74814	0.978467		5.01736	5.05308	3.41873	0.000825642		4.12869	4.20248	3.1101	0.68707
VACWR065	53636	56656	-	AY243312	755		0.1255	0.323028	0.616619	5.06324e-07		2.6603	2.73357	2.13165	2.17008e-79		2.8554	2.97729	2.35832	7.51611e-39		2.1497	2.62571	2.27648	1.46515e-23		1.67807	2.06498	2.07396	6.08592e-09		7.2211	6.41372	3.50551	7.19366e-83		7.61324	6.83608	3.78999	7.51611e-39		6.65392	6.20315	3.71395	6.86178e-24
VACWR066	56688	56975	+	AY243312	72		0.0937	0.258306	0.599681	0.144392		0.13885	0.351356	0.721144	0.902747		2.12815	2.07698	1.84413	0.0063873		2.1195	2.29477	1.97743	0.00315491		0	1.46586	2.04056	0.937541		0.689255	1.62163	2.03696	0.98777		6.85041	5.45538	3.76011	0.0221855		6.73365	5.64321	3.81914	0.0063873
VACWR067	56970	57359	-	AY243312	98		0.10825	0.636853	1.3335	0.0646463		0.34135	1.50899	2.10659	0.00984509		2.21275	2.72428	2.59967	0.00558727		1.46965	2.47887	2.52268	0.0427053		1.76491	2.46691	2.81148	0.0271953		3.08706	3.97637	3.71542	0.00304631		6.92159	6.25094	4.19311	0.00984509		5.82805	5.738	4.12403	0.0427053
VACWR068	57346	59346	-	AY243312	501		0.8957	1.37758	1.49569	8.52127e-39		3.6339	3.27641	2.34869	3.42987e-63		4.1967	3.67147	2.59811	4.4648e-36		3.2639	3.14303	2.44152	2.17796e-26		5.04439	4.65596	3.2196	2.27411e-48		8.31152	7.10916	3.72526	3.42987e-63		9.19722	7.76509	3.94505	4.4648e-36		8.07682	6.95502	3.84425	2.17796e-26
VACWR069	59394	59720	-	AY243312	82		0.16675	0.227061	0.351213	0.00132125		0.4486	0.615367	0.671711	0.00991346		5.6018	4.62225	2.8864	1.12599e-08		4.99195	4.08763	2.73118	5.73377e-07		1.29248	1.75877	1.80135	0.0753376		3.08496	2.73427	2.2936	0.0176207		10.4938	8.93188	3.97316	2.62866e-09		9.64124	8.17202	3.86924	5.73377e-07
VACWR070	59866	60804	-	AY243312	235		0.074	0.172917	0.350456	0.120128		0.3896	0.860603	1.10553	0.000121577		3.9049	3.92153	2.71535	7.25749e-21		2.6921	3.07362	2.5088	3.56167e-13		1.32193	1.68793	1.75731	0.120128		3	3.23014	2.66374	2.38077e-05		8.74416	8.08902	3.85207	4.52897e-22		7.42626	6.92585	3.67776	4.5142e-14
VACWR071	60811	61032	-	AY243312	55		0.3814	1.05219	1.36494	0.00133363		3.0486	3.09834	2.88109	0.000507924		3.0095	3.04108	2.95571	0.0885007		2.3523	2.67899	2.71864	0.209377		3.39232	3.69144	3.33225	0.0150145		7.81057	6.40186	4.59843	0.00133363		7.86419	6.30531	4.87577	0.0885007		6.88631	5.81326	4.54362	0.209377
VACWR072	61033	61842	-	AY243312	203		1.4617	1.74515	1.56623	1.7514e-27		5.6591	4.88246	2.45128	3.78268e-44		5.5299	4.81358	2.56878	1.7514e-27		4.7267	4.22806	2.50025	3.50354e-25		6.05094	5.29762	3.26232	1.14776e-21		10.5167	9.13498	3.35964	8.99704e-42		10.4909	9.1642	3.71103	1.7514e-27		9.60604	8.41496	3.57243	1.89879e-24
VACWR073	61925	64240	-	AY243312	579		0.1575	0.357958	0.651034	6.82767e-09		2.205	2.36733	1.6767	2.99028e-100		2.1861	2.40561	1.79121	9.26619e-41		2.088	2.35605	1.82045	5.95847e-32		2	2.10349	2.09478	2.23274e-05		6.69349	6.24897	2.78579	2.99028e-100		6.91049	6.4301	2.98466	6.73757e-43		6.65821	6.21703	2.98434	2.08727e-32
VACWR074	64267	64506	-	AY243312	60		0.01355	0.048685	0.324766	0.95377		0.14875	0.436398	0.72384	0.87747		0.65625	1.26238	1.5668	0.551289		0.88255	1.27249	1.30769	0.448711		0	0.873466	1.2765	0.98633		1.58496	2.16949	2.17579	0.650558		4.23686	4.29428	3.1509	0.551289		4.30089	4.30831	2.87732	0.551289
VACWR075	64525	65673	-	AY243312	287		0.0194	0.12315	0.459309	0.977717		0.2295	0.553049	0.827993	0.2394		0.4764	1.23875	1.48272	0.881138		0.4381	1.26733	1.54793	0.993484		0	1.13038	1.45709	0.990967		2	2.44799	2.35659	0.0969931		3.32193	3.84473	3.37532	0.937649		3.1375	3.84961	3.35797	0.996739
VACWR076	65666	66937	-	AY243312	318		0.04205	0.188293	0.616506	0.88055		0.1231	0.294716	0.784276	1		0.9729	1.7104	1.77539	0.0247549		1.1102	1.87993	1.98628	0.11945		0	1.19625	1.80586	0.999949		0	1.28043	1.89122	1		4.96574	4.87879	3.4331	0.0247549		5.00624	4.93421	3.63868	0.0804152
VACWR077	66943	68973	+	AY243312	508		0.0375	0.149725	0.500009	0.928459		0.2877	0.618763	0.911924	0.000429376		0.363	0.823048	1.07464	1		0.39095	0.885227	1.13533	0.999999		0	1.30466	1.71422	0.988222		2.32193	2.61928	2.43926	0.00194226		3.16992	3.26994	2.71194	1		3	3.23221	2.80685	1
VACWR078	68977	70752	-	AY243312	444		0	0.111169	0.52752	0.999961		0.0473	0.146781	0.659019	1		0.88475	1.69034	1.91434	0.183617		1.1335	2.09811	2.21847	0.0162975		0	1.2117	1.65301	0.992294		0	1.04615	1.5937	1		4.78658	4.63399	3.72885	0.209911		5.08746	5.21699	3.87691	0.0162975
VACWR079	70749	71084	-	AY243312	84		0.0093	0.0296619	0.207218	0.949432		0.04655	0.0332488	0.263688	1		0.7252	1.8489	2.07388	0.456601		1.1825	2.18363	2.35248	0.371822		0	1.01954	1.43399	0.968514		0	0.847638	1.27745	1		4.32445	4.67128	4.09481	0.543399		5.23365	5.13472	4.21493	0.371822
VACWR080	71078	71740	+	AY243312	166		0.09405	0.239433	0.482328	0.156487		1.16165	1.4667	1.50469	6.79846e-11		1.20005	1.63602	1.64012	0.00510633		0.6693	1.28049	1.40944	0.757522		1.58496	1.88776	1.95115	0.0514163		4.94208	4.49725	3.08644	1.56e-09		5.33516	4.81352	3.35773	0.00793439		4.16006	4.16997	3.00416	0.650958
VACWR081	71710	72084	-	AY243312	94		0.0659	0.119464	0.342835	0.458962		0.0931	0.198437	0.474869	0.997461		2.2962	2.62335	2.16719	0.000293951		2.7193	2.9497	2.35211	0.000130842		0	1.31886	1.67528	0.939314		0	1.19629	1.64638	0.999944		7.03514	6.35991	3.74873	0.000293951		7.50369	6.75008	3.74346	5.55603e-05
VACWR082	72087	73391	+	AY243312	326		0.14265	0.382779	0.7384	9.84004e-05		1.0303	1.55605	1.66137	9.38472e-14		1.16595	1.76043	1.85153	0.0201372		0.7584	1.46381	1.65271	0.477922		1.88753	2.18589	2.25773	0.000352553		4.85454	4.45984	3.32443	5.97487e-12		5.38715	4.91378	3.59661	0.0429177		4.16993	4.28804	3.37325	0.609056
VACWR083	73399	73590	+	AY243312	48		0.4581	0.506085	0.511605	0.00104405		3.6816	3.14465	1.99814	6.84024e-09		3.6233	3.11904	2.07507	0.000111122		2.52305	2.43161	1.81707	0.0027576		3.32193	3.08083	2.33193	0.0027576		8.43915	7.15084	3.37125	6.84024e-09		8.68646	7.2578	3.54598	0.000111122		7.19046	6.18127	3.38632	0.0027576
VACWR084	73592	74089	+	AY243312	125		0.0759	0.12921	0.367987	0.105164		0.4507	0.91557	1.23168	0.00597951		1.2678	1.56891	1.50443	0.00352366		1.0191	1.47908	1.47065	0.0366072		1	1.42708	1.65566	0.360336		3.16992	3.36366	2.79723	0.00111324		5.36807	4.98881	2.99598	0.00111324		4.88264	4.53244	3.10855	0.0760604
VACWR085	74054	75169	-	AY243312	279		0.0248	0.11644	0.419541	0.998653		0.142	0.330983	0.627915	0.994107		1.8851	1.98393	1.68838	1.52891e-09		2.1276	2.2085	1.87993	1.36312e-08		0	1.20885	1.63563	0.998012		1.20163	1.81416	1.99377	0.979197		6.47573	5.53717	3.24286	6.67863e-09		6.62205	5.73675	3.37375	1.36312e-08
VACWR086	75200	75982	+	AY243312	196		-0.01485	0.054101	0.299673	0.999961		0.0881	0.152061	0.416745	0.999999		2.5834	2.7423	2.07011	2.13061e-12		1.4147	1.80918	1.5788	3.85253e-05		0	1.02735	1.43028	0.998349		0	1.13368	1.47963	1		7.35539	6.60898	3.59748	1.74813e-11		5.4757	5.19913	3.08708	7.01158e-05
VACWR087	76002	77024	+	AY243312	256		0.0596	0.222691	0.728326	0.47509		0.1507	0.394043	0.813875	0.856005		3.98085	3.74985	2.34947	5.88294e-30		2.8901	2.88095	2.06788	6.46108e-20		0	1.3323	1.9693	0.999306		1.26178	1.85764	2.07814	0.985746		9.04575	8.13824	3.40819	3.61061e-32		7.71181	6.89566	3.27565	6.46108e-20
VACWR088	77025	77777	+	AY243312	188		0.0217	0.10123	0.35818	0.86304		0.2295	0.351822	0.488669	0.211239		3.495	3.2892	1.96066	9.95916e-25		3.1113	2.93905	1.90266	7.62292e-18		0.514285	1.26995	1.551	0.6951		1.88753	1.93342	1.86298	0.470943		8.44285	7.48153	3.29394	1.71926e-22		7.86405	6.95376	3.16534	1.83626e-18
VACWR089	77809	78072	+	AY243312	66		0.3312	1.02852	1.39011	0.00460524		1.89605	2.73431	2.6198	0.000378054		2.17655	2.8511	2.79368	0.194526		1.5328	2.42203	2.49999	0.194526		3.50225	3.83239	3.22303	0.000378054		6.43725	5.92451	4.40026	0.000143559		6.88835	6.13629	4.68892	0.194526		5.90689	5.48763	4.39026	0.194526
VACWR090	78062	79114	-	AY243312	264		0.06415	0.229628	0.705606	0.289861		0.23485	0.558916	1.03086	0.0370447		1.27795	1.60956	1.5558	0.000533955		1.5469	1.92822	1.74999	0.000341432		0	1.27355	1.73793	0.997244		1.58496	2.09734	2.19441	0.901948		5.30012	4.72571	3.15269	0.000133476		5.73043	5.17888	3.26788	0.000215089
VACWR091	79139	79894	+	AY243312	189		0	0.0358561	0.24835	0.999995		0.1333	0.258721	0.458322	0.979302		1.9138	2.28691	1.88425	2.55375e-10		1.9668	2.4407	2.10643	1.04228e-08		0	1.00788	1.40489	0.999775		1.32193	1.66121	1.8361	0.979302		6.55459	6.07345	3.26516	2.55375e-10		6.37504	6.08561	3.49649	4.28219e-09
VACWR092	79904	80290	+	AY243312	97		0	0.0261887	0.221127	0.997887		0.0044	0.0572062	0.244743	1		1.2134	1.45687	1.41728	0.0518847		1.2356	1.55641	1.5375	0.154967		0	0.801938	1.32653	0.999891		1	1.20464	1.34344	0.999755		5.27799	4.64372	3.19092	0.0774079		5.29646	4.65476	3.25564	0.0518847
VACWR093	80247	80708	+	AY243312	116		0	0.0353664	0.26124	0.999467		0.1067	0.164633	0.375588	0.996584		1.0819	1.80888	1.78219	0.0386311		1.25655	2.0064	1.95092	0.0817116		0	0.835817	1.27749	0.99994		1.10082	1.38263	1.49215	0.983864		5.33516	5.26691	3.33846	0.0253648		5.29032	5.36798	3.49609	0.0386311
VACWR094	80724	81257	+	AY243312	134		0.57395	0.98091	1.12858	1.30985e-11		4.6874	4.10585	2.31103	1.44153e-27		4.7794	4.26189	2.5037	1.78566e-17		4.4607	4.07335	2.53848	5.10469e-16		3.84796	3.62414	2.80668	1.09664e-07		9.43239	8.2812	3.25196	1.8185e-26		9.79814	8.55383	3.64504	1.78566e-17		9.28249	8.28517	3.48388	2.51836e-15
VACWR095	81323	82324	+	AY243312	251		0.1926	0.554749	0.850358	6.7126e-07		2.1754	2.34998	1.94466	9.21211e-27		2.7881	2.86889	2.29713	1.17652e-13		2.6323	2.79939	2.32642	4.24656e-10		2.23266	2.59595	2.60584	0.00268869		6.61029	5.93655	3.34017	4.26883e-26		7.58646	6.74233	3.72698	2.14301e-12		7.22882	6.52101	3.6976	4.24656e-10
VACWR096	82239	82796	+	AY243312	140		0.1261	0.425974	0.811874	0.0171178		1.40245	2.01089	1.93478	2.70409e-15		1.6595	2.20971	2.15851	0.00147935		1.26545	2.02413	2.08617	0.135921		1.50896	2.25033	2.51648	0.0257618		5.62204	5.43596	3.31829	5.75336e-16		6.04218	5.57128	3.83799	0.00147935		5.39232	5.36948	3.52884	0.0752638
VACWR097	82857	83258	-	AY243312	101		0	0.0262168	0.247665	0.963621		0.0489	0.0692851	0.248496	1		0.4118	0.765593	0.809144	0.91836		0.585	0.994944	1.06723	0.88385		0	1.03207	1.40643	0.963621		0	0.824981	1.20111	1		3.32193	3.31328	2.56084	0.944541		3.7866	3.70541	2.77428	0.840136
VACWR098	83365	87225	+	AY243312	965		0.1806	0.403273	0.676883	1.86707e-17		1.9511	2.16515	1.77164	1.73135e-97		2.1353	2.3887	1.97545	1.62312e-40		1.8504	2.1749	1.90068	3.6689e-27		2.16992	2.31547	2.20958	8.44741e-16		6.32193	5.70148	3.16324	6.02894e-103		6.7879	6.12576	3.43038	2.37572e-39		6.18982	5.67563	3.36336	5.00887e-25
VACWR099	87222	87737	-	AY243312	129		0.0365	0.311953	0.995337	0.810656		0.3631	1.16975	1.55192	0.000377945		0.9425	1.71077	1.86974	0.240677		1.2224	2.00228	2.09774	0.145344		0	1.50229	2.14078	0.854656		2.8679	3.39676	3.20949	0.0261618		4.75489	4.69102	3.59541	0.240677		5.12928	5.0316	3.77723	0.0793269
VACWR100	87751	88320	+	AY243312	143		0.0332	0.182937	0.692603	0.909649		0.1016	0.350436	1.06914	0.985334		0.7653	1.37477	1.57188	0.120802		1.0238	1.54505	1.6304	0.120802		0	1.19519	1.75625	0.998757		0.37851	1.40537	1.87999	0.999948		4.45943	4.38782	3.03299	0.120802		4.79181	4.61732	3.07653	0.120802
VACWR101	88323	89297	-	AY243312	243		0.074	0.299263	1.13246	0.152347		0.4903	1.06803	1.61186	4.44165e-07		2.5477	2.62536	2.17779	2.17158e-10		2.9871	3.04951	2.41404	6.07476e-12		1.1375	1.6593	2.19449	0.152347		3.27798	3.49223	3.02213	2.24906e-07		7.18686	6.37902	3.58298	2.17158e-10		7.80542	6.74371	3.83685	9.14342e-11
VACWR102	89298	91685	-	AY243312	597		0.0186	0.0847608	0.489243	0.999959		0.0931	0.237249	0.726276	1		0.402	1.02957	1.35104	1		0.4381	1.13893	1.46105	0.999986		0	1.0702	1.44076	1		0	1.21811	1.79637	1		3.16992	3.54999	3.02047	1		3.16992	3.7134	3.0599	0.999942
VACWR103	91871	92482	+	AY243312	153		1.6167	1.60509	1.37074	2.20992e-20		5.7905	4.94936	2.37344	1.34929e-31		6.1254	5.04906	2.51216	1.53943e-24		5.5434	4.5578	2.44612	5.69847e-22		6.3837	5.31286	2.90918	3.64547e-21		10.7142	9.29386	3.35313	1.76814e-30		11.0982	9.53864	3.61504	1.53943e-24		10.4192	8.88001	3.52907	8.42219e-23
VACWR104	92483	93427	+	AY243312	236		0	0.204152	0.617984	0.992081		0.43275	1.17526	1.68796	0.00250884		1.41045	2.16772	2.15249	0.000161925		0.94055	1.78641	1.93919	0.198737		0	1.33993	1.87769	0.994514		3.16992	3.58164	3.32328	0.00250884		5.77054	5.5784	3.78536	1.03542e-05		4.73564	4.89926	3.55014	0.134214
VACWR105	93464	93904	+	AY243312	111		0.0423	0.100162	0.318011	0.64781		0.4454	0.639443	0.707815	0.000285059		3.9405	3.5059	2.24406	1.15723e-11		2.7635	2.64123	1.96938	6.86934e-07		0	1.11759	1.56445	0.981847		3.21723	2.96735	2.19175	2.74741e-05		8.70044	7.77854	3.38242	1.15723e-11		7.32643	6.39122	3.39006	4.72552e-06
VACWR106	93948	96482	+	AY243312	634		0.2219	0.48005	0.690084	3.26111e-18		2.8222	2.78287	2.03712	3.7625e-81		3.42535	3.27178	2.32259	7.54728e-51		2.41645	2.65212	2.13708	3.48519e-30		2.74416	2.68403	2.31499	1.83438e-20		7.45198	6.58849	3.31951	3.74516e-85		8.37611	7.32591	3.65541	1.03273e-49		7.02233	6.37147	3.50163	9.06197e-30
VACWR107	96441	96881	-	AY243312	110		0.0186	0.0792273	0.236937	0.947693		0.142	0.224369	0.39637	0.986075		0.43945	1.10461	1.24538	0.804536		0.585	1.19621	1.35107	0.747658		0	1.10958	1.44843	0.947693		1	1.60157	1.72194	0.986075		3.5667	3.81938	3.07401	0.804536		4.08746	3.83097	3.20987	0.683122
VACWR108	96874	97587	+	AY243312	178		0.037	0.186689	0.728324	0.89877		0.09075	0.266411	0.757623	0.998325		0.76215	1.46076	1.61772	0.353974		0.86835	1.52546	1.67767	0.250027		0	1.29848	1.80534	0.922892		1	1.55947	1.82386	0.993421		4.58496	4.54279	3.26208	0.250027		4.56914	4.50567	3.27247	0.204868
VACWR109	97587	98243	+	AY243312	164		0.2083	0.330026	0.521992	0.00186462		2.9662	2.83853	1.94647	2.02426e-21		3.1282	3.20038	2.2187	3.72488e-14		2.4924	2.89298	2.17331	5.26786e-12		2	2.1496	2.09842	0.00487804		7.55528	6.74221	3.3073	1.14493e-20		7.97579	7.3404	3.57825	3.72488e-14		7.19967	6.70674	3.66979	5.26786e-12
VACWR110	98275	100632	+	AY243312	590		0.3126	0.630874	0.855461	9.20871e-24		3.8349	3.51603	2.347	5.38787e-88		3.82495	3.54237	2.4819	2.01354e-48		3.02855	2.98075	2.35209	2.68461e-25		2.92588	3.03125	2.5584	4.36529e-26		8.62114	7.51224	3.53326	6.98801e-89		8.86571	7.63542	3.81216	1.05488e-46		7.75723	6.75467	3.73594	4.36529e-26
VACWR111	100673	102586	+	AY243312	478		0.04515	0.113458	0.315786	0.78157		0.23745	0.724386	1.18754	0.0124553		0.80345	1.42675	1.56439	0.168401		0.58185	1.17233	1.35519	0.992372		0	1.20654	1.5573	0.992372		2.32193	2.81581	2.75296	0.0124553		4.62929	4.5275	3.19553	0.0780725		3.83288	4.01129	2.90853	0.984265
VACWR112	102613	103098	+	AY243312	121		0.4317	0.742249	0.928245	1.15822e-05		3.6604	3.64034	2.13948	3.63723e-25		3.8328	3.79028	2.25219	3.26599e-19		2.8763	3.10891	2.15979	2.65155e-11		3.16992	3.31814	2.77557	4.9075e-06		8.38457	7.9296	2.99419	1.52378e-27		8.89026	8.32126	3.05261	3.26599e-19		7.58271	7.29236	3.09383	6.72147e-12
VACWR113	103061	103975	-	AY243312	229		0.0365	0.116509	0.37898	0.854825		0.1333	0.246795	0.545667	0.998852		2.6658	2.64548	2.22201	9.72704e-08		2.9542	2.91114	2.47071	2.00631e-07		0	1.21057	1.63028	0.991414		1.32193	1.54998	1.71925	0.998852		7.43045	6.31318	3.78794	4.0601e-07		7.48382	6.45278	4.05917	4.62612e-08
VACWR114	104017	104658	+	AY243312	160		0.2065	0.538645	0.871761	2.25456e-07		1.377	1.80593	1.82639	2.85183e-11		0.9654	1.68019	1.846	0.117791		0.65755	1.34615	1.6202	0.653619		2.32193	2.67414	2.50951	1.18064e-05		5.48054	5.01985	3.35209	8.04209e-13		4.98864	4.836	3.55844	0.0482847		3.97532	4.12052	3.30065	0.709935
VACWR115	104655	105401	+	AY243312	187		0.074	0.179802	0.398084	0.232353		0.1864	0.692142	1.10386	0.615005		0.615	1.14919	1.37995	0.767647		0.415	1.04083	1.26455	0.979842		1	1.52891	1.77639	0.384995		1.58496	2.61178	2.80521	0.615005		3.9542	3.86239	3.21008	0.720674		3.58496	3.65702	2.92205	0.971515
VACWR116	105402	107297	-	AY243312	474		0.0551	0.300342	0.831509	0.590806		0.3377	1.16612	1.8741	0.000544031		2.0117	2.34532	2.15478	1.68627e-13		2.3149	2.63845	2.29996	4.51256e-15		0	1.64645	2.13812	0.908602		2.45943	3.32298	3.41995	0.00188099		6.63646	5.91031	3.76262	8.32896e-14		6.96462	6.17936	3.85245	2.12618e-15
VACWR117	107332	108195	-	AY243312	216		0.19955	0.545771	0.844901	1.27022e-07		2.9807	2.91742	2.45308	8.65106e-19		3.36395	3.26581	2.73043	2.66036e-07		3.2079	3.12645	2.68587	5.45996e-07		2.10434	2.6533	2.51224	2.68962e-05		7.59465	6.46039	4.0496	3.28891e-21		8.33804	7.02085	4.3537	2.72271e-08		8.05284	6.71782	4.30462	2.66036e-07
VACWR118	108226	109881	-	AY243312	414		0.0343	0.113589	0.420496	0.978115		0.4845	0.875221	1.0673	1.08075e-11		3.016	3.13983	2.37515	9.40253e-31		3.00975	3.26521	2.49854	1.09379e-29		0	1.33773	1.66546	0.978115		3.45943	3.43701	2.61919	1.29562e-12		7.90113	7.17654	3.73448	9.40253e-31		7.74147	7.20304	3.78221	3.65543e-29
VACWR119	109905	110357	-	AY243312	113		0.0248	0.116408	0.349583	0.906201		0.415	0.691481	0.892132	0.00407485		2.9386	2.64694	2.26448	0.00122791		3.0056	2.86009	2.3833	7.20098e-05		0	1.18939	1.5613	0.934038		3.08746	3.05603	2.47881	0.00122791		7.84361	6.37889	3.85062	0.000638813		7.69697	6.5499	3.85895	0.000154801
VACWR120	110378	111052	-	AY243312	169		0.0186	0.071958	0.255119	0.97741		0.0962	0.190989	0.587275	0.999998		1.0684	1.73467	1.78255	0.0322754		1.541	2.10237	2.08605	0.00435767		0	1.07028	1.41923	0.989629		0	1.22896	1.76116	1		5.20945	4.95775	3.43043	0.0451453		5.72792	5.32878	3.72157	0.00435767
VACWR121	111049	111279	-	AY243312	58		0.029	0.15109	0.506377	0.881476		0.15065	0.345476	0.593474	0.881476		1.32	2.05951	1.9025	0.012373		2.1749	2.73382	2.2247	2.25831e-07		0	0.876066	1.59683	0.999847		0.38277	1.36572	1.73902	0.994036		5.83089	5.883	2.99676	0.00596407		6.74122	6.62715	3.34487	1.0158e-06
VACWR122	111294	113228	-	AY243312	484		0.10245	0.255481	0.562678	0.00275214		1.2988	1.62163	1.50973	8.63518e-45		3.5349	3.34289	2.18236	5.73909e-50		4.1431	3.79127	2.41547	1.05724e-52		1.72247	1.90526	1.98385	0.00275214		5.34513	4.88395	2.93331	2.0403e-45		8.52356	7.55208	3.43288	5.73909e-50		9.05053	7.9614	3.55771	5.21523e-52
VACWR123	113281	114126	-	AY243312	212		0.57055	0.818268	0.909055	8.86851e-15		3.59225	3.3808	1.73049	6.5082e-48		4.99055	4.59427	2.07544	4.47633e-43		5.19195	4.73289	2.18134	8.53715e-40		4.22085	3.70897	2.59043	8.48733e-14		8.49883	7.76264	2.49203	1.39944e-50		10.2256	9.26173	2.94695	5.94307e-42		10.297	9.27199	3.0349	7.36056e-41
VACWR124	114164	114658	+	AY243312	124		0.19175	0.509321	0.799462	0.0044667		3.1736	3.23562	2.27984	1.92219e-17		2.99055	3.18651	2.37744	3.26954e-10		2.0954	2.54369	2.23325	1.69596e-06		2.45344	2.59632	2.39059	0.00041013		7.89781	7.12737	3.51746	2.98873e-18		7.90681	7.18471	3.72502	3.26954e-10		6.67718	6.28012	3.47437	1.69596e-06
VACWR125	114655	115773	-	AY243312	279		-0.0169	0.0268297	0.244969	0.999999		0.0962	0.128535	0.310203	1		1.9773	2.34165	2.06197	7.14216e-10		1.6167	2.04286	1.89292	5.96544e-05		0	0.992612	1.37943	0.999844		0	1.17647	1.44657	1		6.62936	5.99879	3.64693	3.2831e-10		6.06609	5.52022	3.38629	5.96544e-05
VACWR126	115797	117929	-	AY243312	533		0.0375	0.175825	0.588643	0.869966		0.142	0.374895	0.808802	0.999867		0.8196	1.45029	1.59077	0.130034		1.5076	2.1414	2.1189	1.34282e-06		0	1.26939	1.66293	0.994037		1	1.73505	2.04397	0.999993		4.52356	4.45549	3.23528	0.0968718		5.72792	5.42368	3.68508	2.05249e-06
VACWR127	117983	118849	+	AY243312	217		0.2756	0.627099	0.902364	1.97229e-08		2.7311	2.62621	2.20488	3.19973e-16		2.454	2.54193	2.20101	8.22121e-07		1.415	1.88387	1.85139	0.000536403		2.80735	2.91972	2.68654	3.1757e-06		7.26491	6.14444	3.80897	7.55673e-18		7.15987	6.16083	3.86129	9.32204e-08		5.64386	5.09256	3.5315	0.00136712
VACWR128	118842	119168	-	AY243312	82		0.037	0.133965	0.367836	0.709443		0.0541	0.174713	0.494221	0.999994		1.7717	2.21889	2.05715	0.00271796		2.5405	2.78914	2.37297	1.61586e-05		0	1.23452	1.56924	0.780147		0	0.893442	1.47872	1		6.41782	5.57959	3.87427	0.00271796		6.95223	6.36985	3.91852	0.000110982
VACWR129	119169	121844	-	AY243312	669		0.0071	0.0697087	0.290994	0.99998		0.0489	0.0911801	0.343974	1		3.419	3.26213	2.30949	2.32435e-54		4.1655	3.84357	2.59495	1.68421e-58		0	1.15224	1.49326	0.999816		0	0.955152	1.30224	1		8.35315	7.37908	3.58773	3.26361e-53		9.02237	7.93164	3.77986	1.01723e-59
VACWR130	121859	122815	+	AY243312	239		0.0186	0.0944774	0.315739	0.980881		0.1555	0.316648	0.534853	0.84966		1.0718	1.67222	1.68417	0.0772856		0.7935	1.41451	1.50342	0.397951		0	1.25171	1.54585	0.922714		1.43296	1.80373	1.9075	0.922714		5.2854	4.97245	3.30776	0.0098434		4.45943	4.39443	3.1232	0.349011
VACWR131	122817	123395	-	AY243312	145		0.0973	0.174494	0.350053	0.0673427		0.2157	0.352399	0.517144	0.309223		5.5841	5.16205	2.33785	9.47217e-32		6.1085	5.67519	2.41169	1.99354e-29		0.76554	1.50187	1.69579	0.56592		1	1.76612	1.88844	0.932657		10.6868	9.9444	2.92795	1.45367e-30		10.9741	10.3345	2.9731	9.47217e-32
VACWR132	123419	123631	-	AY243312	53		-0.0385	0.013117	0.270927	0.986496		0.0962	0.189525	0.479442	0.99367		3.4654	3.19925	2.49589	0.000401165		3.8447	3.59426	2.65897	0.00013427		0	0.907394	1.38377	0.973281		0.37851	1.35218	1.62082	0.986496		8.46434	6.78929	4.41146	0.00109509		8.62022	7.44283	4.12319	0.00013427
VACWR133	123739	124011	-	AY243312	68		0	0.051475	0.359201	0.942873		0.0989	0.134021	0.485355	0.994831		3.90405	3.30463	2.4199	7.03708e-06		4.13695	3.81826	2.66493	2.05799e-06		0	1.1809	1.68889	0.965941		0	1.31377	1.76822	0.994831		8.88645	7.39289	4.07848	7.03708e-06		8.95569	7.84272	4.23414	5.54863e-07
VACWR134	124028	124189	-	AY243312	40		0	0.0549375	0.232445	0.991705		0.00565	0.0947175	0.480955	0.999979		0.1428	0.672345	1.25733	0.999909		0.1375	0.856013	1.46414	0.998889		0	1.01238	1.36644	0.92307		0	0.930909	1.37362	0.99966		1.43296	2.46221	3.02553	0.999909		1.50896	2.90385	3.24944	0.996787
VACWR135	124179	124463	-	AY243312	71		0.0385	0.154854	0.370546	0.593706		0.0902	0.195546	0.456444	0.991503		1.8433	2.32771	2.00589	0.00203256		2.6705	3.13458	2.44084	0.000151582		0	1.20512	1.72265	0.971593		0	1.48785	1.8131	0.984036		6.35755	6.02067	3.53107	0.000383382		7.37938	6.98415	3.77398	5.61343e-05
VACWR136	124447	125580	-	AY243312	283		0.0186	0.138133	0.409403	0.952073		0.1299	0.208157	0.511057	0.999976		3.0173	2.98654	2.41216	7.50162e-12		3.9676	3.68101	2.79007	7.78386e-17		0	1.31007	1.70949	0.97846		0	1.24038	1.71441	1		7.88874	6.7753	3.98796	2.15372e-13		8.74147	7.54856	4.17536	7.78386e-17
VACWR137	125583	126194	-	AY243312	153		0.0596	0.13514	0.398975	0.435809		0.1101	0.211435	0.512875	0.999682		1.976	3.10225	2.89229	0.00017149		2.9189	3.5926	3.25005	4.58823e-05		0	1.14068	1.71131	0.99991		0	1.28189	1.66354	0.999995		6.59991	6.59058	4.50906	0.00173613		7.63662	7.06071	4.81973	2.277e-05
VACWR138	126209	127690	+	AY243312	370		0.0936	0.228923	0.57557	0.0430499		1.057	1.3804	1.28485	1.81981e-33		1.5353	1.80189	1.55503	1.29458e-13		0.9078	1.28695	1.28913	0.115882		1	1.64541	1.88751	0.137464		4.9542	4.56888	2.68676	2.91469e-32		5.99207	5.35451	3.06867	6.30467e-13		4.64386	4.3924	2.70576	0.0534599
VACWR139	127671	127904	-	AY243312	58		-0.01985	0.0263914	0.356161	0.925997		0	0.132003	0.539967	0.987627		4.59835	4.17209	2.45868	2.25831e-07		5.3963	4.83788	2.78444	1.0158e-06		0	1.22787	1.48045	0.925997		0	1.18093	1.7652	0.999569		9.81754	8.60293	3.60467	1.0158e-06		10.6664	9.09118	3.99388	2.25831e-07
VACWR140	127905	128258	-	AY243312	89		0	0.0955865	0.371754	0.95534		0.0489	0.143904	0.465491	1		0.5863	1.08285	1.21099	0.664096		1.0931	1.58982	1.62677	0.0446604		0	1.08743	1.61701	0.997228		0	0.954793	1.52796	1		3.21723	3.5947	3.04257	0.801715		5.01346	4.62351	3.29894	0.068684
VACWR141	128257	129537	+	AY243312	320		0.1041	0.303858	0.6319	0.00804688		1.0932	1.73512	1.769	1.5156e-19		1.2313	1.91083	1.9503	0.00149458		0.8424	1.65829	1.78716	0.170979		1.26178	1.79388	1.99173	0.0810732		5.04439	4.80625	3.25974	5.02789e-23		5.45943	5.16109	3.53078	0.00214287		4.51409	4.6742	3.39351	0.120187
VACWR142	129467	130030	+	AY243312	141		0.0375	0.139104	0.374516	0.693244		0.9014	1.19835	1.28384	2.72358e-10		1.4053	1.70611	1.49934	0.000184088		1.3026	1.63109	1.47245	0.00201531		0	1.28835	1.63942	0.880856		4.58496	4.07882	2.83464	7.34354e-09		5.80735	5.22475	3.0259	1.04797e-05		5.42626	4.9463	2.96417	0.000645157
VACWR143	130050	131198	+	AY243312	287		0.3067	0.771531	1.05021	3.20354e-13		3.0238	3.06813	2.34519	7.98982e-35		3.0924	3.10314	2.43644	1.31403e-16		2.4034	2.75822	2.34444	5.50237e-11		3	3.29438	2.82404	1.0563e-11		7.67948	6.82931	3.67894	4.33996e-34		8.01569	6.95344	3.93312	1.74519e-18		6.89118	6.35668	3.82954	1.0563e-11
VACWR144	131195	134689	+	AY243312	874		0.12345	0.285984	0.564485	4.51723e-06		2.6642	2.72205	1.95628	2.93249e-129		2.626	2.75377	2.03111	3.81977e-63		2.10185	2.38194	1.92667	1.56113e-37		1.88753	1.99753	2.01885	2.18774e-07		7.27937	6.61178	3.14823	4.92115e-131		7.46025	6.78884	3.315	1.49769e-67		6.62936	6.14076	3.22838	3.89424e-39
VACWR145	134694	134891	-	AY243312	50		-0.0567	-0.004372	0.265783	0.998699		0.02705	0.0611	0.39542	0.999955		0.66715	0.982158	0.879252	0.664094		1.5717	1.7657	1.39353	0.00767334		0	0.927702	1.41017	0.9967		0	0.925606	1.33962	0.999988		3.92899	3.95897	2.50986	0.760056		5.75889	5.4019	2.67071	0.0164196
VACWR146	134860	135324	-	AY243312	116		0.0697	0.243468	0.714576	0.463039		0.21515	0.428737	0.815464	0.39037		2.8694	2.66584	1.59942	9.86319e-13		4.6874	4.05162	2.11461	1.47833e-15		1.32193	1.78503	2.06675	0.201735		0.572025	1.82229	2.22256	0.846455		7.83277	6.87018	2.87064	2.12437e-13		9.61907	8.38453	3.20376	1.47833e-15
VACWR147	135596	136279	-	AY243312	171		0.0186	0.111931	0.330638	0.915758		0.1193	0.253326	0.463473	0.992919		3.6726	3.5332	1.65503	3.17383e-34		5.1319	4.85501	1.91345	1.10126e-41		0	1.35296	1.59349	0.820583		0.76553	1.55292	1.81951	0.997127		8.58233	8.17047	2.17395	3.17383e-34		10.0593	9.52422	2.25014	2.61272e-40
VACWR148	136239	138416	-	AY243312	544		0.0627	0.194928	0.494136	0.318619		0.1375	0.284255	0.572855	0.999527		3.4227	3.12171	2.0829	2.17753e-47		4.68075	4.14152	2.52882	1.48441e-65		0.37851	1.47836	1.83829	0.792342		1	1.55401	1.86025	0.999995		8.34849	7.26503	3.30278	4.36803e-51		9.51262	8.34512	3.56864	1.48441e-65
VACWR149	138461	139963	-	AY243312	376		0.0185	0.04835	0.252404	0.999995		0.142	0.224312	0.399861	0.998383		2.03945	2.09067	1.6693	7.86166e-15		2.85565	2.67311	2.05596	1.6267e-17		0	0.945715	1.36697	1		1	1.57338	1.68665	0.99961		6.74535	5.79559	3.18846	3.37626e-15		7.60733	6.41453	3.50757	1.01327e-16
VACWR150	140013	140345	-	AY243312	83		0	0.176012	0.617293	0.992384		0.1866	0.400583	0.768746	0.586798		4.0815	3.55755	2.00893	6.6666e-11		4.5676	4.06379	2.19775	1.19732e-11		0	1.03808	1.62973	0.995982		1.20163	1.73666	1.82162	0.863866		8.97154	8.00424	2.94817	6.6666e-11		9.53041	8.48728	2.97504	2.90033e-13
VACWR151	140346	140786	-	AY243312	111		0.0936	0.344373	0.787774	0.28461		0.142	0.652228	1.19039	0.82871		1.1083	1.8094	1.92022	0.0918286		1.0231	1.79498	1.95501	0.223903		1.32193	1.86921	2.2607	0.223903		1.58496	2.37688	2.69584	0.64781		4.92125	4.90863	3.606	0.127303		4.65535	4.87127	3.48401	0.17129
VACWR152	140787	141704	-	AY243312	229		0.0936	0.318758	0.639731	0.0562745		1.1119	1.74764	1.82495	9.17215e-12		1.1583	1.95744	2.10257	0.0171169		0.8405	1.72408	2.00656	0.395799		1.58496	2.06136	2.24324	0.0235956		5.08746	4.85189	3.47187	5.89579e-14		5.40939	5.15949	3.88347	0.0122208		4.56682	4.69257	3.7	0.254408
VACWR153	141667	141900	-	AY243312	58		0.0112	0.17239	0.547851	0.820928		0.1712	0.916762	1.73596	0.881476		2.73775	2.52121	2.09905	0.00267743		2.5518	2.34121	2.01225	0.012373		0.600815	1.75816	2.16095	0.552158		1.63152	2.8976	3.46834	0.744079		7.73978	6.15363	3.99237	0.00111628		7.30833	5.75547	3.94376	0.00596407
VACWR154	142060	142434	+	AY243312	94		0.19175	1.02804	1.42237	0.000130842		1.48085	2.51484	2.50532	8.65846e-06		1.1369	2.44101	2.54003	0.128221		0.78655	2.1806	2.48007	0.458962		2.60861	3.49715	3.34334	0.000630693		5.63922	5.70901	4.14588	3.62718e-07		5.32193	5.81461	4.11697	0.128221		4.43809	5.25073	4.10311	0.378595
VACWR155	142401	143213	-	AY243312	203		0	0.102573	0.429859	0.99903		0.0902	0.174324	0.596733	1		0.4513	1.03962	1.29144	0.954077		0.415	0.98805	1.26963	0.999931		0	0.942243	1.37097	0.999979		0	0.916442	1.35826	1		3.27798	3.65437	2.90873	0.982509		3	3.347	2.9213	0.999931
VACWR156	143331	143888	+	AY243312	140		1.1929	1.52628	1.44218	3.50971e-22		3.8486	3.43051	2.03877	5.72448e-25		4.1881	3.65872	2.22807	1.16553e-16		4.21945	3.85506	2.37683	5.75336e-16		5.74791	5.12306	3.07544	1.16553e-16		8.68352	7.52632	3.25991	4.44744e-23		9.31458	7.93556	3.54772	4.10062e-18		9.31705	8.07626	3.55557	5.75336e-16
VACWR157	143912	144418	+	AY243312	127		0.0759	0.164474	0.332696	0.238961		0.3896	0.734288	0.973322	0.0549248		3.1441	3.03934	2.59078	4.0311e-05		3.2207	3.26506	2.83208	8.50472e-05		0.26304	1.56493	1.80418	0.638606		2.80735	3.11977	2.63338	0.0037598		8.04821	6.7592	4.21184	1.84631e-05		7.99831	6.76258	4.55125	4.0311e-05
VACWR158	144462	144992	+	AY243312	133		0.9069	1.35687	1.5362	1.94281e-14		3.8624	3.61167	2.28589	3.17739e-22		4.0363	3.75667	2.39621	4.18162e-15		3.6366	3.54063	2.41933	8.59028e-14		5.22882	4.76674	3.06224	1.65831e-16		8.64674	7.70617	3.43567	3.17739e-22		9.02237	8.12272	3.4397	1.65831e-16		8.43338	7.5796	3.72011	8.59028e-14
VACWR159	145059	145724	+	AY243312	167		0.598	1.1825	1.34853	1.45597e-12		3.6361	3.42787	2.26997	2.2086e-25		4.0392	3.80046	2.53022	6.12408e-16		4.0402	3.86819	2.61056	7.70067e-18		4.24793	4.27602	3.07543	1.47949e-16		8.41659	7.51262	3.36026	5.05099e-31		9.03425	8.00849	3.79429	6.12408e-16		8.77314	7.9115	3.91397	1.6559e-18
VACWR160	145788	146579	+	AY243312	198		0.6615	1.24113	1.4752	4.88283e-24		3.7223	3.67564	2.34384	4.20383e-36		3.74545	3.6429	2.47428	3.02017e-21		3.0757	3.23316	2.3774	2.8901e-15		4.54842	4.37094	3.13176	4.34365e-18		8.5263	7.88623	3.26263	9.14998e-43		8.70647	7.86953	3.65006	3.02017e-21		7.87896	7.25334	3.54342	8.34918e-16
VACWR161	146669	146857	+	AY243312	47		0.2439	0.47257	0.672188	0.00931192		2.4518	2.45076	1.95202	2.76981e-06		2.7007	2.58305	2.02648	0.00397136		2.2685	2.33887	1.92641	0.019993		3.1375	3.02499	2.16619	4.92444e-05		7.07361	5.97752	3.67331	0.000173001		7.5812	6.35863	3.69968	0.00397136		6.92719	5.89556	3.54038	0.019993
VACWR162	146854	147687	-	AY243312	209		0	0.0502636	0.246571	0.999572		0.0489	0.0725684	0.268734	1		0.5863	0.970402	1.10868	0.833571		0.4594	0.813965	0.924602	0.999973		0	1.00683	1.36646	0.99887		0	0.865289	1.26189	1		3.97269	3.73507	2.8213	0.709943		3.49825	3.42432	2.47938	0.999572
VACWR163	147590	148477	+	AY243312	222		0.0596	0.246411	0.797555	0.420242		0.2321	0.561798	1.04623	0.101067		0.70295	1.33656	1.4919	0.420242		1.2775	1.98101	2.00317	0.00642067		1	1.51052	1.7985	0.473255		1.69616	2.15767	2.28399	0.631363		4.10008	4.18652	3.05223	0.727043		5.31777	5.10348	3.59448	0.00930974
VACWR164	148474	148902	+	AY243312	107		0.0627	0.108078	0.37718	0.423401		0.0489	0.192282	0.530189	0.998235		0.372	1.02017	1.25127	0.959323		0.8329	1.61553	1.72828	0.166853		0	1.08465	1.45526	0.994201		0	1.20801	1.54826	0.999954		3.80735	3.70076	2.88656	0.877054		4.80735	4.64983	3.28625	0.166853
VACWR165	148928	149407	+	AY243312	120		0.3227	0.737389	0.979277	1.88358e-09		2.94215	2.89457	2.14625	6.08052e-13		2.94975	2.98866	2.2866	5.59386e-08		2.6629	2.80086	2.22851	5.59386e-08		3.14547	3.27481	2.64637	5.59386e-08		7.52354	6.62662	3.54351	5.37704e-15		7.77681	6.87776	3.74023	1.88638e-08		7.39101	6.57209	3.54318	1.59053e-07
VACWR166	149505	150164	-	AY243312	165		0.1267	0.194099	0.323755	0.00962101		1.4721	1.65665	1.35698	1.58227e-15		1.4731	1.65855	1.387	2.24363e-05		0.8874	1.18412	1.09964	0.218184		1.80735	1.81864	1.77002	0.0144824		5.60585	4.98826	2.85919	4.53415e-18		5.52356	5.12912	2.94017	2.53809e-06		4.52356	4.19122	2.62682	0.320281
VACWR167	150328	150729	+	AY243312	101		0.0248	0.0569455	0.252723	0.91836		0.1506	0.213532	0.37493	0.963621		2.4878	2.47707	1.82051	1.86157e-07		3.2846	3.22846	2.22925	1.77603e-08		0	1.31466	1.5716	0.840136		2	1.99568	1.72508	0.275354		7.24603	6.46249	3.3137	5.9034e-08		8.2384	7.26969	3.60225	3.46546e-10
VACWR168	150767	151351	+	AY243312	146		0.0365	0.0593144	0.266561	0.892843		0.142	0.325673	0.561261	0.892843		0.38085	1.11206	1.41373	0.971698		0.6781	1.44121	1.66186	0.71874		0	1.03918	1.46285	0.996941		1.43296	1.86153	2.02021	0.94223		3.26178	3.80326	3.16575	0.971698		4.32193	4.41568	3.26916	0.46704
VACWR169	151359	151595	+	AY243312	59		0.3955	0.992853	1.18569	0.000101861		3.7043	3.25865	2.35745	8.48984e-13		3.7822	3.45698	2.60672	9.58389e-06		3.6515	3.33856	2.66906	0.000773583		3.80735	3.92624	2.93398	3.26532e-05		8.43463	7.17029	3.46642	8.76959e-11		8.7039	7.6819	3.54324	2.56281e-06		8.41785	7.19983	3.85204	0.000292182
VACWR170	151693	152733	-	AY243312	260		1.6017	1.76897	1.41049	1.87777e-35		5.08145	4.57776	2.07249	1.83507e-61		4.80425	4.28133	2.15109	2.5409e-43		4.04555	3.651	2.09955	1.35272e-31		6.09063	5.59029	2.94478	6.19441e-38		9.90198	9.04059	2.8067	4.18867e-60		9.85481	8.86896	2.99803	2.79652e-44		8.85539	7.92596	3.12695	4.24686e-33
VACWR171	152780	153157	+	AY243312	95		0.0551	0.154745	0.455419	0.659129		0.0633	0.351031	1.15517	0.999788		1.3672	1.90408	1.85167	0.0321064		1.8787	2.28972	2.06499	0.00365656		0	1.32389	1.80275	0.967894		0	1.32369	2.36214	0.999994		5.70044	5.29203	3.43355	0.00668935		6.2384	5.73972	3.55416	0.00191644
VACWR172	153147	153869	+	AY243312	181		0.817	1.33112	1.49361	1.50068e-19		4.4251	3.89789	2.51276	4.14766e-27		4.0452	3.72847	2.60891	2.07709e-16		3.268	3.3001	2.54142	1.29893e-12		4.85798	4.50126	3.19389	3.01103e-18		9.28702	7.90788	3.77187	4.14766e-27		9.04248	7.83892	3.94211	1.27823e-17		8.00562	7.10016	3.96688	4.00938e-12
VACWR173	153917	154675	-	AY243312	190		1.7424	2.13459	1.74399	5.20113e-34		4.3083	4.10465	2.09801	1.47417e-40		4.01965	3.96044	2.22301	1.83643e-28		3.45795	3.38687	2.23348	1.79307e-16		6.47785	6.1678	3.07014	5.04681e-35		9.0098	8.44556	2.83323	4.91664e-43		9.05844	8.44084	3.0574	1.83643e-28		8.23935	7.5135	3.27356	4.69787e-17
VACWR174	154706	155389	+	AY243312	171		1.1751	1.47298	1.49138	9.01969e-17		4.6019	3.92973	2.61594	2.73588e-22		4.2622	3.80152	2.67135	2.77222e-12		3.8755	3.44428	2.55006	2.65013e-11		5.24031	4.78679	3.27542	5.60967e-15		9.45533	7.85328	4.01005	8.41145e-21		9.26209	7.84992	4.15476	8.55643e-13		8.71081	7.33872	3.95387	8.70449e-12
VACWR175	155437	155925	+	AY243312	122		0.0948	0.24197	0.501582	0.0871027		0.8699	1.53085	1.71896	5.41183e-07		0.88705	1.7084	1.85719	0.159654		0.73665	1.53653	1.7835	0.536045		1.88753	1.98402	1.9446	0.00240044		4.63363	4.52023	3.34199	1.39394e-06		4.89395	4.91563	3.50462	0.207643		4.30551	4.373	3.53924	0.536045
VACWR176	155958	157616	+	AY243312	415		0.0936	0.292155	0.598048	0.0153295		0.926	1.3072	1.28934	2.55103e-26		1.1063	1.52095	1.46547	1.76055e-05		1.1558	1.58794	1.53251	0.000198112		1.58496	1.90419	2.07921	0.0846105		4.54226	4.32671	2.77878	7.08337e-30		5.10852	4.77841	3.08791	1.13738e-05		5.14975	4.79711	3.07806	0.000198112
VACWR177	157669	158673	+	AY243312	251		0.6215	0.979263	1.1155	1.51385e-23		4.3017	3.92653	2.38198	2.59962e-38		4.019	3.81619	2.45929	8.46488e-25		3.433	3.31998	2.36186	1.69759e-19		4.24793	4.01459	2.7217	2.44966e-22		9.09144	8.04068	3.50359	4.98576e-41		9.01402	8.07577	3.62277	4.26883e-26		8.23458	7.25562	3.66117	5.86057e-19
VACWR178	158743	159315	+	AY243312	143		0.8021	1.3396	1.44491	2.46121e-17		3.6856	3.5136	2.25885	8.9229e-25		3.3805	3.25333	2.30704	2.75932e-15		2.76	2.7972	2.22028	2.58838e-08		4.59694	4.64942	2.94564	4.62375e-18		8.47978	7.57371	3.26589	9.52022e-26		8.34518	7.36761	3.4838	1.21152e-14		7.42206	6.58519	3.46928	2.58838e-08
VACWR179	159621	159932	+	AY243312	78		0.1641	0.264946	0.400714	0.00216744		1.4027	1.38916	1.04489	9.03852e-10		2.7116	2.49245	1.54244	4.29109e-09		3.0296	2.72008	1.68885	4.29109e-09		1.90368	2.04782	1.85611	0.0267722		5.45449	4.83939	2.35466	1.74293e-10		7.49362	6.57043	2.94777	9.03852e-10		7.6957	6.7559	2.94309	4.29109e-09
VACWR180	160439	162133	+	AY243312	424		0.2089	0.483999	0.896943	1.69496e-08		1.69965	1.98383	1.76137	1.79069e-48		1.65535	2.02258	1.8758	5.39053e-09		1.29525	1.86849	1.84304	8.87323e-05		2.32193	2.44935	2.32799	2.99492e-09		5.9036	5.31192	3.17355	5.80803e-43		5.99983	5.44922	3.41051	2.99492e-09		5.33804	5.07984	3.33385	0.000274617
VACWR181	162183	163127	+	AY243312	236		0.1359	0.29119	0.496442	9.67047e-05		1.8303	1.92711	1.51948	2.56982e-28		2.30895	2.46357	1.83514	1.05298e-17		2.3431	2.53559	1.94439	3.48719e-15		1.80735	2.05375	2.06086	0.00165599		6.1271	5.52323	2.93074	3.44015e-26		6.90329	6.43314	3.2125	3.51916e-17		6.94232	6.40212	3.23195	3.48719e-15
VACWR182	163272	163727	+	AY243312	114		0.263	0.585864	0.801371	4.00216e-06		2.77935	2.78684	1.89467	3.40701e-22		3.3419	3.28013	2.20955	5.84005e-13		3.4233	3.37687	2.3536	1.14159e-11		2.80735	2.92715	2.4839	9.79818e-06		7.32057	6.77931	3.06311	3.45992e-20		8.22377	7.55095	3.31393	5.84005e-13		8.22881	7.48508	3.48628	1.14159e-11
VACWR183	163878	164780	+	AY243312	226		0.54405	0.833301	0.932562	3.19121e-20		3.3002	3.18297	1.93999	1.76877e-37		3.5757	3.42366	2.098	5.33773e-29		3.34335	3.36558	2.14463	2.33843e-25		4.04415	3.71015	2.59171	1.70297e-18		7.97903	7.30414	2.99964	2.05866e-41		8.53045	7.73215	3.22282	5.33773e-29		8.17662	7.5169	3.25684	4.6652e-26
VACWR184	164870	165529	+	AY243312	165		3.2829	3.09986	1.69293	1.30792e-32		6.8066	6.25156	1.9428	1.60115e-44		7.046	6.30374	2.08374	5.67783e-40		6.8573	6.03703	2.24945	7.12693e-35		8.31424	7.59359	2.86294	1.30792e-32		11.5603	10.737	2.6291	6.52616e-43		12.0374	10.9727	2.86804	4.53598e-36		11.6817	10.5892	2.97808	7.12693e-35
VACWR185	165565	166068	+	AY243312	126		2.45825	2.45713	1.95969	1.84617e-20		6.0616	5.21476	2.63929	1.58166e-26		6.02145	5.09679	2.7611	9.78548e-19		5.5578	4.92773	2.76051	6.40822e-18		7.32141	6.47787	3.38665	1.84617e-20		11.0476	9.49191	3.54339	2.09379e-25		11.031	9.51769	3.75994	1.39417e-19		10.4742	9.23262	3.70837	9.78548e-19
VACWR186	166594	168270	+	AY243312	419		0	0.0499563	0.255163	0.999997		0.0884	0.175597	0.523088	1		0.2701	0.772931	1.06812	1		0.3524	1.02969	1.35633	0.999988		0	1.00825	1.39764	0.999992		0.37851	1.31724	1.67037	1		2.74416	3.09219	2.79381	1		3	3.511	3.05267	0.999981
VACWR187	168374	169327	+	AY243312	238		0.1426	0.273544	0.476627	1.77727e-06		1.53365	1.57237	1.23747	8.99467e-29		2.9962	2.80034	1.91083	1.77944e-21		3.3252	3.10052	2.13048	6.96004e-21		1.63152	1.96558	1.95812	0.0115423		5.82586	5.0266	2.60515	4.79181e-28		7.86728	6.97292	3.1062	4.43396e-22		8.1016	7.23135	3.18489	4.43396e-22
VACWR188	169409	169930	+	AY243312	130		0.26075	0.528751	0.737114	0.00101189		2.422	2.51161	1.89784	2.66148e-17		3.04435	2.95091	2.22183	6.92318e-08		3.16595	3.04611	2.34242	6.92318e-08		2.6427	2.82218	2.54294	0.000546281		6.97326	6.24057	3.28207	7.02189e-19		7.89218	6.89954	3.70799	6.92318e-08		7.91885	6.87881	3.76107	1.8669e-07
VACWR189	169968	170516	+	AY243312	138		0.01875	0.0753333	0.243498	0.9894		0.142	0.446085	0.811789	0.899263		0.4134	1.22293	1.68773	0.963275		0.39675	1.45252	1.98567	0.9894		0	1.13396	1.42736	0.926204		1.80735	2.22727	2.27236	0.600728		3.5667	3.87068	3.41143	0.963275		3.40593	4.12864	3.63721	0.963275
VACWR190	170571	171389	+	AY243312	205		0.9831	1.40544	1.405	1.56905e-19		5.0792	4.2775	2.60996	6.05468e-38		5.194	4.25538	2.72903	9.63061e-18		4.6886	4.00987	2.72752	5.18914e-15		5.37504	4.75091	3.07442	1.79462e-23		9.87682	8.3369	3.76794	6.30397e-36		10.1342	8.39158	4.11018	3.58297e-17		9.50144	7.97878	4.09272	1.55856e-15
VACWR191	171476	171709	+	AY243312	59		0.3182	0.553863	0.760624	0.000101861		2.7379	2.55074	1.73378	8.76959e-11		3.8696	3.47271	2.23474	2.56281e-06		4.2138	3.85742	2.36748	4.5262e-09		3.45943	2.99828	2.27893	0.000773583		7.34696	6.36575	2.90846	4.5262e-09		8.82972	7.50991	3.54166	9.58389e-06		9.02292	8.02353	3.2972	6.20814e-07
VACWR192	171672	172172	+	AY243312	126		0.1069	0.248354	0.450886	0.0647881		0.75585	1.18144	1.30093	1.14098e-05		1.2446	1.84442	1.78178	0.00156281		1.7593	2.3166	2.04945	2.55163e-05		1.65372	1.77254	1.86658	0.211396		4.44055	3.90644	2.92924	0.000114989		5.24341	5.14754	3.40064	0.00276801		6.13661	5.81293	3.51083	1.14098e-05
VACWR193	172244	172462	+	AY243312	55		0.1903	0.347724	0.447729	0.0032279		2.7456	2.66709	1.67759	9.11417e-10		2.6807	2.71013	1.8622	1.65269e-05		2.0768	2.31104	1.7949	5.68053e-05		1.48543	2.11422	2.09259	0.0885007		7.27612	6.63708	2.84977	9.11417e-10		7.48382	6.65356	3.35176	4.34969e-06		6.58496	6.06455	3.12906	5.68053e-05
VACWR194	172529	173380	+	AY243312	213		0.7063	1.38355	1.593	1.79881e-15		3.2928	3.31033	2.53901	2.84468e-28		2.9895	3.17278	2.65584	6.36549e-09		2.4594	2.83244	2.55465	1.75577e-05		4.54226	4.32861	3.46899	1.07465e-11		7.95245	7.14661	3.70786	2.10883e-32		7.8392	6.90861	4.16707	4.71687e-10		7.03342	6.35569	4.0241	9.45407e-06
VACWR195	173473	174510	+	AY243312	259		0.8372	1.02739	0.967825	7.25894e-33		4.7652	4.36702	1.90744	1.66567e-58		4.6794	4.25641	2.00449	3.4874e-50		3.9237	3.62295	1.99658	3.97008e-42		4.71699	4.31228	2.51775	3.27065e-29		9.55459	8.84102	2.62966	8.02438e-60		9.72451	8.8794	2.82623	2.0256e-52		8.83605	7.98842	2.86263	3.30735e-41
VACWR196	174585	175034	+	AY243312	112		3.25965	2.99445	1.78844	4.87839e-25		6.5513	5.92104	2.00091	2.1763e-32		6.10825	5.52441	2.11313	1.24128e-27		4.86145	4.55732	2.06107	1.13126e-19		8.36417	7.51158	2.9828	9.90413e-23		11.1913	10.609	2.30252	2.1763e-32		11.1635	10.3381	2.66994	4.87839e-25		9.97489	9.11301	2.79106	1.13126e-19
VACWR197	175118	176098	+	AY243312	245		0.0551	0.261421	0.733779	0.55082		0.2365	0.628687	1.03997	0.0625138		2.3495	2.49546	1.98101	2.02564e-14		2.883	3.01062	2.28001	2.02564e-14		0	1.2962	1.90745	0.999324		2.51096	2.50697	2.38805	0.0203474		7.01903	6.29394	3.41466	5.7045e-14		7.59842	6.90562	3.48054	2.39933e-15
VACWR198	176144	177166	-	AY243312	256		0.03725	0.105349	0.321145	0.905376		0.32645	0.556038	0.75799	0.0102847		0.37445	0.788541	0.927688	0.999306		0.3785	0.84371	1.03272	0.999993		0	1.29983	1.60935	0.924783		2.49547	2.57878	2.37169	0.0589989		3.10424	3.2573	2.64192	0.999826		3.04373	3.24127	2.72841	0.999987
VACWR199	177306	179030	+	AY243312	431		0.0551	0.182141	0.420684	0.576378		0.3677	0.871694	1.15772	5.57924e-05		0.4671	1.14585	1.43358	0.966467		0.5694	1.40857	1.73437	0.949316		0	1.5552	1.87281	0.807026		2.80735	3.16302	2.81885	1.62212e-05		3.58496	3.83901	3.12697	0.966467		3.80735	4.09683	3.4268	0.807026
VACWR200	179102	180157	+	AY243312	264		1.1485	1.56656	1.55746	6.19982e-29		5.38965	4.79013	2.48545	6.03179e-55		5.3903	4.79821	2.62697	1.16858e-40		4.62615	4.2174	2.65263	4.79391e-31		5.54885	4.95137	3.2495	1.38811e-27		10.1693	9.12658	3.2712	2.30474e-57		10.3742	9.30613	3.48141	2.40532e-44		9.48198	8.49684	3.52274	2.88257e-33
VACWR201	180315	180485	+	AY243312	43		0.2153	0.422402	0.52339	0.000956981		1.3969	2.1217	2.11639	0.0631447		1.372	2.59725	2.58525	0.271192		0.9758	2.40548	2.43249	0.380396		3	2.86713	2.08254	0.000956981		5.49185	5.07803	3.9877	0.032997		5.74147	5.78497	4.50537	0.271192		4.80735	5.49085	4.2284	0.380396
VACWR202	180482	180643	+	AY243312	40		0.3348	0.499045	0.59526	0.00321329		3.0955	3.12707	1.71099	9.7325e-09		4.25415	3.97648	2.00606	9.28512e-08		4.0243	3.6749	1.96907	6.91306e-07		3.4915	3.11306	2.12676	0.000339774		7.64478	7.28267	2.74398	9.7325e-09		9.18093	8.62801	2.57215	9.28512e-08		8.79406	8.04423	2.83766	6.91306e-07
VACWR203	180898	181827	+	AY243312	232		0.074	0.228423	0.490433	0.162365		1.14815	1.65664	1.65886	1.95142e-16		1.58985	2.11111	1.99777	4.94052e-05		1.26785	1.86549	1.88503	0.00747719		1	1.76508	1.98866	0.235129		5.16993	4.732	3.27067	5.16169e-14		6.14975	5.55313	3.60761	4.94052e-05		5.33622	5.05637	3.48377	0.00514935
VACWR204	181839	182243	+	AY243312	101		0.1884	0.392666	0.628109	0.0140447		1.3899	1.94318	1.9148	1.86157e-07		1.7424	2.37077	2.26751	0.023022		1.2955	2.099	2.168	0.21308		2	2.22052	2.21017	0.0140447		5.2555	5.13641	3.4591	1.77603e-08		6.44294	5.79918	3.90989	0.00253869		5.44956	5.29879	3.73446	0.11615
VACWR205	182511	183572	+	AY243312	266		0.0837	0.250469	0.484185	0.121991		0.9318	1.38532	1.44539	3.8398e-13		1.2414	1.9364	1.89639	0.00085715		1.17525	1.90594	1.93988	0.00589958		1	1.76573	1.987	0.250049		4.41613	4.31125	3.0445	5.62274e-14		5.41664	5.36588	3.41899	0.00129754		5.18969	5.11607	3.49116	0.0115559
VACWR206	183734	184306	+	AY243312	143		0.0551	0.173188	0.514825	0.630932		0.341	0.658049	0.851564	0.00124339		1.1252	1.71131	1.5667	0.00215049		1.1054	1.73003	1.60521	0.0146658		0	1.33392	1.80804	0.934011		3	2.9064	2.44365	0.000382153		5.45943	5.22737	3.09069	0.000382153		5.17792	5.17538	3.04217	0.00215049
VACWR207	184578	184766	-	AY243312	48		0.0824	0.422525	0.894922	0.442717		1.7366	2.20787	2.02242	3.08482e-05		1.72825	2.14312	2.15452	0.0297317		1.1563	1.7216	1.92899	0.332733		1.55551	2.016	2.36059	0.442717		6.03371	5.65332	3.3019	1.65263e-06		6.36718	5.63909	3.67707	0.00664164		5.18097	4.83872	3.3951	0.332733
VACWR208	184741	185295	-	AY243312	139		0.1591	0.397471	0.65925	0.00533914		2.4458	2.51071	1.94038	2.00736e-19		2.0512	2.33444	2.01707	1.75623e-06		1.2288	1.87994	1.80372	0.0308247		1.58496	2.10928	2.24444	0.154376		6.94251	6.22497	3.19285	2.00736e-19		6.66534	5.93597	3.61259	2.97771e-07		5.32193	5.22198	3.24026	0.0447262
VACWR209	185807	186802	+	AY243312	249		0.1587	0.295143	0.514405	0.000111556		1.848	2.08236	1.81811	6.23573e-22		1.9125	2.19667	1.91049	3.12604e-07		1.7253	2.11387	1.85913	2.17379e-06		2	2.06878	2.04527	0.00173597		6.20359	5.54843	3.25227	2.241e-24		6.53138	5.85899	3.39919	1.5824e-07		6.18982	5.56245	3.38946	6.06973e-07
VACWR210	186957	187379	-	AY243312	106		2.4388	2.463	1.58363	3.22724e-22		6.10525	5.48079	2.2636	2.23397e-23		5.68305	5.06711	2.28306	3.09905e-17		4.58975	4.20715	2.16595	1.53012e-15		7.41357	6.80846	2.90605	4.45168e-20		10.9407	9.97076	3.07969	6.36793e-26		10.7142	9.69942	3.22918	3.09905e-17		9.46317	8.58055	3.22379	1.53012e-15
VACWR211	187652	187990	+	AY243312	85		0.1409	0.452321	0.736698	0.0963802		2.3032	2.46802	1.83166	2.31429e-11		2.9438	2.91868	2.05319	4.20616e-08		2.9099	2.81122	2.14623	3.69797e-05		1.58496	2.37596	2.46577	0.0963802		6.96347	6.276	3.08872	6.44416e-13		7.82528	7.07552	3.2331	4.20616e-08		7.65821	6.66081	3.47078	4.90599e-06
VACWR212	188295	188624	+	AY243312	83		0.288	0.455083	0.671397	0.0137671		2.4029	2.38846	1.68461	2.90033e-13		2.6773	2.81577	1.87045	6.6666e-11		2.5277	2.84855	1.86826	6.6666e-11		2.40599	2.57507	2.35835	0.0137671		6.74147	6.21109	2.9548	2.90033e-13		7.36457	7.06615	2.95278	6.6666e-11		7.20945	7.03231	2.85373	6.6666e-11
VACWR213	188557	188751	+	AY243312	48		0.3311	0.390529	0.413031	0.00104405		3.19865	2.66181	1.44607	6.56293e-11		3.59625	2.98486	1.65321	6.84024e-09		3.25735	2.99336	1.7078	3.1202e-07		3.24593	2.70175	1.96069	0.00104405		7.93063	6.89267	2.23358	4.18154e-12		8.48129	7.43299	2.56848	6.84024e-09		7.98278	7.29459	2.64321	3.1202e-07
VACWR214	188988	189134	+	AY243312	37		0.0627	0.0760757	0.24831	0.5		1.9025	2.00761	0.955709	7.27596e-12		1.9789	2.33565	1.0444	7.27596e-12		2.1699	2.29163	1.07265	5.12227e-09		1.58496	1.78496	1.67591	0.162004		6.3837	6.28325	1.41606	7.27596e-12		6.94251	6.88154	1.58494	2.76486e-10		6.76818	6.68399	1.6076	5.12227e-09
VACWR215	189252	189620	+	AY243312	93		0.3255	0.444026	0.569636	0.000405004		2.8144	2.72098	1.56272	1.13225e-17		3.4346	3.16909	1.76844	1.80889e-12		3.5392	3.21005	1.87985	1.80889e-12		2.32193	2.50326	2.35913	0.0306929		7.50621	6.81224	2.68415	1.03911e-18		8.47452	7.53655	2.97706	9.69655e-12		8.35315	7.40896	3.07004	9.69655e-12
VACWR216	189575	189793	-	AY243312	54		0.0732	0.238261	0.687168	0.248309		0.00295	0.315307	0.884638	0.889836		0.75295	1.07221	1.08327	0.445962		1.2396	1.59489	1.39834	0.0668371		0	1.62342	2.06578	0.829555		0.29248	1.67635	2.12398	0.933163		4.56142	4.01995	2.66682	0.248309		5.64797	5.0128	2.79353	0.0379524
VACWR217	189738	189923	+	AY243312	46		0.1783	0.335265	0.676132	0.0056758		1.87585	2.0472	1.41623	2.20297e-08		2.18995	2.30809	1.58461	2.02802e-05		1.8232	2.18874	1.64563	4.62385e-06		2	2.05803	2.22513	0.230696		6.26612	5.98615	2.50956	2.5501e-09		7.06858	6.50705	2.63431	2.02802e-05		6.41186	6.10994	2.77621	2.02802e-05
VACWR218	190337	191071	+	AY243312	183		2.1592	2.14216	1.47929	7.81818e-40		6.6855	6.27843	1.57138	8.15663e-56		6.7029	6.32959	1.59682	8.15663e-56		6.1187	5.78276	1.77946	8.33255e-50		6.90087	6.5845	2.38365	4.05254e-45		11.5103	11.0953	1.51155	8.15663e-56		11.775	11.3605	1.57704	8.15663e-56		11.1475	10.6531	1.88579	1.37333e-51
Number expressed										76					137					138					131					73					138					139					132
P value cutoff	0.0001
